# Supplementary material for: Label-Free Protein-RNA Interactome Analysis Identifies Khsrp Signaling Downstream of the p38/Mk2 Kinase Complex as a Critical Modulator of Cell Cycle Progression
Source: PLoS One. 2015 May 20;10(5):e0125745. doi: 10.1371/journal.pone.0125745 (PMC4439058; doi:10.1371/journal.pone.0125745)
Supplement: S2 Table — (XLSX) [file pone.0125745.s006.xlsx]

## Sheet: Mk2_MS
Gene names	log2FC	-log10P	mock	Eto	Protein IDs	Majority protein IDs	Protein names	Proteins
Mrps30	-1.00161	3.31645	74241670	37079330	Q9D0G0	Q9D0G0	28S ribosomal protein S30, mitochondrial	1
Prpf8	-4.4441	3.26203	180913300	8311169	Q99PV0;B7ZC27	Q99PV0	Pre-mRNA-processing-splicing factor 8	2
Slirp;1810035L17Rik	1.15792	3.1635	31854330	71078340	Q9D8T7;Q9D8T7-2;F7DE82;F8WHU8	Q9D8T7;Q9D8T7-2;F7DE82;F8WHU8	SRA stem-loop-interacting RNA-binding protein, mitochondrial	4
Fam98a	-2.09626	3.04089	141623300	33120490	Q3TJZ6	Q3TJZ6	Protein FAM98A	1
Hnrpdl	1.29923	3.00471	213890000	526376600	D3YTQ3;F6VQH5;Q9Z130	D3YTQ3;F6VQH5;Q9Z130	Heterogeneous nuclear ribonucleoprotein D-like	3
BC006779	-4.1245	2.99797	407556600	23366340	A2AS03;E9QAM5;A2AS05	A2AS03;E9QAM5;A2AS05		3
Srsf6	1.25286	2.92826	70616980	168290000	Q3TWW8	Q3TWW8		1
Dhx9	-2.1045	2.88768	658590100	153143300	E9QNN1;O70133-2;O70133;O70133-3	E9QNN1;O70133-2;O70133;O70133-3	ATP-dependent RNA helicase A	4
Srsf3;Gm12355	1.2775	2.76693	92738660	224815000	P84104;P84104-2;A2A4X6	P84104;P84104-2;A2A4X6	Serine/arginine-rich splicing factor 3	3
Srsf2	1.14632	2.70209	299590000	663139800	Q62093	Q62093	Serine/arginine-rich splicing factor 2	1
Sf3b4	1.6594	2.65612	44270340	139843300	Q8QZY9	Q8QZY9	Splicing factor 3B subunit 4	1
Grsf1	1.05093	2.64119	226116800	468483200	Q8C5Q4;E9Q179;D3YUN1;D3YV30	Q8C5Q4;E9Q179	G-rich sequence factor 1	4
Srsf1	1.49631	2.60813	145863300	411509900	H7BX95;Q6PDM2;Q6PDM2-2;Q6PDM2-3;F7AI47;F6QXN3	H7BX95;Q6PDM2;Q6PDM2-2;Q6PDM2-3	Serine/arginine-rich splicing factor 1	6
Puf60	1.34364	2.58889	49555340	125766700	Q3UEB3;Q3UEB3-2;Q3UEB3-3	Q3UEB3;Q3UEB3-2;Q3UEB3-3	Poly(U)-binding-splicing factor PUF60	3
Eif3c	-1.45591	2.52039	680439900	248036700	Q8R1B4	Q8R1B4	Eukaryotic translation initiation factor 3 subunit C	1
Khsrp	1.48106	2.51225	1973166000	5508169000	Q3U0V1	Q3U0V1	Far upstream element-binding protein 2	1
FAM120A	-1.02545	2.48252	2337366000	1148250000	Q6A0A9	Q6A0A9	Constitutive coactivator of PPAR-gamma-like protein 1	1
Mrpl37	-0.689845	2.46995	30327010	18800340	Q921S7	Q921S7	39S ribosomal protein L37, mitochondrial	1
Pspc1	1.43537	2.46544	50503340	136586600	Q8R326;Q8R326-2;F7D909	Q8R326;Q8R326-2	Paraspeckle component 1	3
Srsf5	1.41484	2.33332	172339900	459510000	Q9D8S5;O35326	Q9D8S5;O35326	Serine/arginine-rich splicing factor 5	2
Upf1	-0.735187	2.29629	910509800	546979900	Q9EPU0;Q9EPU0-2;Q6ZQJ5	Q9EPU0;Q9EPU0-2	Regulator of nonsense transcripts 1	3
Hnrnpd	1.33075	2.29443	698120000	1756000000	Q60668;G3X9W0;Q60668-2;Q60668-3;G5E8G0;Q60668-4;F6ZV59;F6SHF3;E9Q5B6;Q9D3U4;F7A465	Q60668;G3X9W0;Q60668-2;Q60668-3;G5E8G0;Q60668-4;F6ZV59;F6SHF3;E9Q5B6	Heterogeneous nuclear ribonucleoprotein D0	11
Fubp1	1.07205	2.24478	323576700	680293400	Q91WJ8-2;Q91WJ8;Q3TUE1	Q91WJ8-2;Q91WJ8;Q3TUE1	Far upstream element-binding protein 1	3
Api5	0.505402	2.24462	77221010	109616700	O35841	O35841	Apoptosis inhibitor 5	1
Rbms1	0.80252	2.2041	59252320	103344600	E9PZ21;Q91W59;Q91W59-3;Q91W59-2	E9PZ21;Q91W59;Q91W59-3;Q91W59-2	RNA-binding motif, single-stranded-interacting protein 1	4
Mrpl44	0.778344	2.16914	47692320	81800010	Q9CY73;Q9CY73-2	Q9CY73;Q9CY73-2	39S ribosomal protein L44, mitochondrial	2
Tcea1	1.29314	2.15116	789516300	1934800000	P10711;E9PYD5	P10711;E9PYD5	Transcription elongation factor A protein 1	2
Lrpprc	0.791317	2.1502	5165370000	8939468000	Q6PB66;F6V2A3;G3UYW1;Q6VNB8;REV__Q9ET54;REV__Q9ET54-6;REV__Q9ET54-2;Q6VNB8-2;Q9JJC6;G3UWK9	Q6PB66	Leucine-rich PPR motif-containing protein, mitochondrial	10
Dazap1	1.25562	2.14654	239613400	572123500	Q3UGB5;Q9JII5;Q9JII5-2;D3Z4J1	Q3UGB5;Q9JII5;Q9JII5-2;D3Z4J1	DAZ-associated protein 1	4
Hnrnpa2b1	1.21183	2.13118	3021701000	6999203000	O88569;O88569-2;O88569-3	O88569;O88569-2;O88569-3	Heterogeneous nuclear ribonucleoproteins A2/B1	3
Sfpq	0.927819	2.11942	746636800	1420400000	Q8VIJ6	Q8VIJ6	Splicing factor, proline- and glutamine-rich	1
Srsf9	1.41838	2.07633	38577990	103113400	Q9D0B0;F6RTE1	Q9D0B0;F6RTE1	Serine/arginine-rich splicing factor 9	2
Gm17352;Rps18;Gm10260	-0.930722	2.07188	54961350	28832500	F6YVP7;P62270;G3UZW2;F5H8M6	F6YVP7;P62270;G3UZW2;F5H8M6	40S ribosomal protein S18	4
Ptcd3	0.634315	2.06603	235216700	365103500	Q14C51;Q99N96;Q9D3F3	Q14C51	Pentatricopeptide repeat-containing protein 3, mitochondrial	3
Parp12	-1.85819	2.05335	76958010	21226670	Q8BZ20	Q8BZ20	Poly [ADP-ribose] polymerase 12	1
Igf2bp1	-0.730582	2.04939	257840000	155390000	O88477	O88477	Insulin-like growth factor 2 mRNA-binding protein 1	1
Ppia;Gm5160	0.633994	2.04485	10958500	17006010	P17742;F8VPN3	P17742;F8VPN3	Peptidyl-prolyl cis-trans isomerase A;Peptidyl-prolyl cis-trans isomerase	2
Srsf7	1.15057	2.04079	261573300	580696700	Q8BL97;Q8BL97-2;Q8BL97-4;Q8BL97-3	Q8BL97;Q8BL97-2;Q8BL97-4;Q8BL97-3	Serine/arginine-rich splicing factor 7	4
Rps9	-1.95417	2.00651	231773300	59813690	Q6ZWN5;Q9CXW7;D3YWH9;F7CJS8;D3Z673;D3YUV6	Q6ZWN5;Q9CXW7;D3YWH9;F7CJS8	40S ribosomal protein S9	6
Rps13	-2.91211	2.00396	133431700	17726660	P62301	P62301	40S ribosomal protein S13	1
Mrpl12	1.92874	1.94868	35292670	134367000	Q9DB15	Q9DB15	39S ribosomal protein L12, mitochondrial	1
Rps17	-0.805493	1.89044	13754990	7870149	P63276	P63276	40S ribosomal protein S17	1
Eif3a	-1.84311	1.88665	899133200	250606600	P23116	P23116	Eukaryotic translation initiation factor 3 subunit A	1
Hnrnph1	1.04716	1.84114	816133300	1686499000	Q8C2Q7;O35737;D3Z6Y3	Q8C2Q7;O35737	Heterogeneous nuclear ribonucleoprotein H;Heterogeneous nuclear ribonucleoprotein H, N-terminally processed	3
Rps2;Rps2-ps6;Rps2-ps5;Gm6576;Gm8225	-2.06004	1.82461	5669368000	1359567000	P25444;D3YWJ3;D3YVC1;J3QMG5;D3Z659;L7N453;E9Q1N8;L7N240;J3QM94;F6YTZ4;D3Z536	P25444;D3YWJ3;D3YVC1;J3QMG5;D3Z659;L7N453;E9Q1N8;L7N240;J3QM94;F6YTZ4;D3Z536	40S ribosomal protein S2	11
St13	1.81039	1.81715	38131000	133740000	Q99L47;E9Q1X9;F8WJK8;E9Q1V0	Q99L47;E9Q1X9;F8WJK8	Hsc70-interacting protein	4
Srsf10;Srsf12	1.01427	1.81298	41537340	83900500	Q9R0U0;Q9R0U0-2;Q9R0U0-3;Q3TFP0;A3KG57	Q9R0U0;Q9R0U0-2;Q9R0U0-3;Q3TFP0;A3KG57	Serine/arginine-rich splicing factor 10	5
Hnrnpab	1.25183	1.7926	343833200	818813600	Q20BD0;Q80XR6;Q99020	Q20BD0;Q80XR6;Q99020	Heterogeneous nuclear ribonucleoprotein A/B	3
Ddx3x;D1Pas1	-1.29884	1.79192	184900000	75152990	Q62167;P16381	Q62167;P16381	ATP-dependent RNA helicase DDX3X;Putative ATP-dependent RNA helicase Pl10	2
Tppp3	1.73746	1.78347	75232330	250860000	Q9CRB6	Q9CRB6	Tubulin polymerization-promoting protein family member 3	1
Cebpz	-2.67847	1.76891	90297020	14105000	P53569;P53569-2	P53569;P53569-2	CCAAT/enhancer-binding protein zeta	2
Hnrnpf	1.05413	1.75128	2129167000	4421133000	Q9Z2X1;Q9Z2X1-2;J3QMQ5;J3QM80;J3QMT0;J3QP45;J3QMV8;J3QNH2	Q9Z2X1;Q9Z2X1-2;J3QMQ5;J3QM80;J3QMT0	Heterogeneous nuclear ribonucleoprotein F;Heterogeneous nuclear ribonucleoprotein F, N-terminally processed	8
Hmgb1	1.21694	1.73558	337813300	785260200	P63158	P63158	High mobility group protein B1	1
Rps27a;Ubc;Ubb;2810422J05Rik;Uba52;Gm7866	1.82725	1.72683	2677434000	9501173000	P62983;P0CG50;P0CG49;Q5SX22;E9QNP0;E9Q5F6;E9Q4P0;P62984;E9Q9J0;J3QK04;F6X7C4;D3YYZ2	P62983;P0CG50;P0CG49;Q5SX22;E9QNP0;E9Q5F6;E9Q4P0;P62984;E9Q9J0;J3QK04;F6X7C4	Ubiquitin-40S ribosomal protein S27a;Ubiquitin;40S ribosomal protein S27a;Polyubiquitin-C;Ubiquitin;Ubiquitin-related 1;Ubiquitin-related 2;Polyubiquitin-B;Ubiquitin;Ubiquitin-60S ribosomal protein L40;Ubiquitin;60S ribosomal protein L40	12
Hist1h1d;Hist1h1c	1.46525	1.69378	58785320	162313300	P43277;P15864;P43275;I7HFT9;Q07133	P43277;P15864	Histone H1.3;Histone H1.2	5
Rps4x;Rps4y2	-3.51471	1.68774	121430000	10624150	P62702;Q3V1Z5	P62702;Q3V1Z5	40S ribosomal protein S4, X isoform	2
Edf1	1.84821	1.67974	267230000	962170000	Q9JMG1	Q9JMG1	Endothelial differentiation-related factor 1	1
Elavl1	0.602256	1.65581	7089928000	10763140000	P70372	P70372	ELAV-like protein 1	1
Celf2	0.816711	1.64639	832866400	1467000000	Q9Z0H4-6;Q9Z0H4-2;Q9Z0H4-9;Q9Z0H4-8;Q9Z0H4;F6V6I8;Q9Z0H4-4;Q9Z0H4-5;Q9Z0H4-7;E9QA47;Q9Z0H4-11;A3KGT2;A3KGT0	Q9Z0H4-6;Q9Z0H4-2;Q9Z0H4-9;Q9Z0H4-8;Q9Z0H4;F6V6I8;Q9Z0H4-4;Q9Z0H4-5;Q9Z0H4-7;E9QA47;Q9Z0H4-11;A3KGT2	CUGBP Elav-like family member 2	13
Fmr1	-2.57868	1.63656	50964340	8531154	E9QAT0;P35922-3;E9QAS8;P35922;Q6AXB7;P35922-2;E9QAS9;P35922-9;E9QNF5;P35922-7;D3Z6U8;P35922-8;P35922-6;P35922-4;P35922-5;P35922-12;P35922-10;P35922-11	E9QAT0;P35922-3;E9QAS8;P35922;Q6AXB7;P35922-2;E9QAS9;P35922-9;E9QNF5;P35922-7;D3Z6U8;P35922-8;P35922-6;P35922-4;P35922-5;P35922-12;P35922-10;P35922-11	Fragile X mental retardation protein 1 homolog	18
Bms1	-2.57942	1.62292	92124960	15413290	Q6PGF5	Q6PGF5		1
Rpl4	-5.36653	1.59641	346470000	8398034	Q9D8E6	Q9D8E6	60S ribosomal protein L4	1
Mov10	-1.55732	1.59311	456433300	155088000	E9PW39;D3YVL0;P23249;D3YYR1	E9PW39;D3YVL0;P23249	Putative helicase MOV-10	4
Tbrg4	0.75349	1.58928	62933010	106096600	Q91YM4;Q91YM4-2;E9PUT1;Q5SWP1;Q5SWP0	Q91YM4;Q91YM4-2;E9PUT1	Protein TBRG4	5
Lsm14a	-1.12197	1.58748	53290990	24485320	Q8K2F8;F6X2V9;A2BH69	Q8K2F8	Protein LSM14 homolog A	3
Rpsa;Rpsa-ps10	-0.414389	1.5811	75898340	56949340	P14206;D3YTT7	P14206;D3YTT7	40S ribosomal protein SA	2
Rpl27	-3.0374	1.57653	109756300	13368500	P61358;E9PV49;A2A4Q0	P61358	60S ribosomal protein L27	3
Pabpc1	0.681966	1.57569	991113000	1590067000	P29341;Q9D4E6;A2A5N3;F6ZAX1	P29341	Polyadenylate-binding protein 1	4
Hnrnpm	-1.59246	1.56469	3242433000	1075210000	Q9D0E1;Q9D0E1-2;B8JK32;B8JK33;F6W322;F7C9U3;G3X924;Q91VC4	Q9D0E1;Q9D0E1-2;B8JK32;B8JK33	Heterogeneous nuclear ribonucleoprotein M	8
Hnrnpk;Gm7964	0.829901	1.55844	2450567000	4356036000	B2M1R6;P61979-3;P61979-2;P61979;D3Z5X4;D3YWG1;H3BKD0;H3BLL4;H3BK96;H3BKI8;Q8BT23;H3BJS9;H3BJ43;H3BLP7	B2M1R6;P61979-3;P61979-2;P61979;D3Z5X4;D3YWG1;H3BKD0;H3BLL4;H3BK96;H3BKI8	Heterogeneous nuclear ribonucleoprotein K	14
Ddx5	-2.81401	1.55029	563783600	80169700	Q8BTS0;Q61656;B1ARB9;B1ARC0;B1ARB8	Q8BTS0;Q61656	Probable ATP-dependent RNA helicase DDX5	5
Stau1	-2.12105	1.51839	57429650	13201900	A2A5S3;Q9DBE7;A2A5R8;Q9Z108;Q8CJ67;Q8CJ67-2;D3Z6D2;Q8CJ67-3;E2QRQ3;Q8CJ67-4	A2A5S3;Q9DBE7;A2A5R8;Q9Z108	Double-stranded RNA-binding protein Staufen homolog 1	10
Mybbp1a	-1.85206	1.51705	871946700	241526600	Q7TPV4	Q7TPV4	Myb-binding protein 1A	1
Ddx3y	-1.443	1.48093	167063300	61445990	Q62095;Q3V086;Q61496	Q62095	ATP-dependent RNA helicase DDX3Y	3
Ddx21	-2.96642	1.47154	436363200	55829990	Q9JIK5	Q9JIK5	Nucleolar RNA helicase 2	1
Rps3	-0.442806	1.46235	1221866000	898930200	P62908;D3YV43	P62908;D3YV43	40S ribosomal protein S3	2
Eef1a1;Eef1a2	0.986981	1.44192	35063340	69496680	P10126;P62631;D3YZ68;D3Z3I8	P10126;P62631	Elongation factor 1-alpha 1;Elongation factor 1-alpha 2	4
Lrrc59	0.643401	1.4406	86491340	135100000	Q922Q8	Q922Q8	Leucine-rich repeat-containing protein 59	1
Rps11	-2.30826	1.41679	364333500	73560340	P62281	P62281	40S ribosomal protein S11	1
Pdcd11	-1.51626	1.41544	727433400	254303400	Q6NS46;Q9CZX2;E9Q9S2;B2KFM8	Q6NS46	Protein RRP5 homolog	4
Hnrnph2	0.967532	1.40508	373416700	730213600	P70333;J3QPH6	P70333	Heterogeneous nuclear ribonucleoprotein H2	2
Rpl7l1	-1.15652	1.379	85271020	38252010	Q9D8M4;Q9D9F1	Q9D8M4	60S ribosomal protein L7-like 1	2
Ncl	1.31574	1.36127	20233990000	50368620000	P09405	P09405	Nucleolin	1
Rpl6;Gm5428	-4.83634	1.34327	244687700	8565051	P47911;E9PUX4	P47911;E9PUX4	60S ribosomal protein L6	2
Pwp2	-1.66809	1.33122	85427350	26881330	Q8BU03	Q8BU03	Periodic tryptophan protein 2 homolog	1
Snrpn;Snrpb	-2.15832	1.33041	79496340	17808510	P63163;P27048	P63163;P27048	Small nuclear ribonucleoprotein-associated protein N;Small nuclear ribonucleoprotein-associated protein B	2
Manf	1.04923	1.32147	39247340	81219330	Q3TMX5;Q9CXI5;Q80ZP8	Q3TMX5;Q9CXI5;Q80ZP8	Mesencephalic astrocyte-derived neurotrophic factor	3
Hnrnph3	0.814882	1.31641	57432320	101032300	D3Z3N4;D3YWT1	D3Z3N4;D3YWT1		2
Ddx17	-2.55547	1.29717	175549900	29862500	Q3U741;Q501J6;Q501J6-2	Q3U741;Q501J6;Q501J6-2	Probable ATP-dependent RNA helicase DDX17	3
Hnrpll	-1.12549	1.29524	195116700	89431310	Q921F4;Q921F4-4	Q921F4	Heterogeneous nuclear ribonucleoprotein L-like	2
Rps7;Gm9493	-2.80416	1.28644	31203010	4467467	J3QJZ3;P62082;F6SVV1	J3QJZ3;P62082;F6SVV1	40S ribosomal protein S7	3
Ptcd2	0.522217	1.26734	17912330	25724990	Q8R3K3	Q8R3K3	Pentatricopeptide repeat-containing protein 2	1
Rps15	-3.12209	1.19132	151986700	17456670	P62843;D3YTQ9;F7ANJ3	P62843;D3YTQ9	40S ribosomal protein S15	3
Fbl	-1.79438	1.1835	238170100	68663330	P35550	P35550	rRNA 2-O-methyltransferase fibrillarin	1
Hnrnpa0	0.775148	1.17566	1554100000	2659633000	Q9CX86	Q9CX86	Heterogeneous nuclear ribonucleoprotein A0	1
Raly;C130057N11Rik	-1.85902	1.17393	926503300	255403300	Q64012-2;Q64012;A2AU62;A2AU61;A2AU60	Q64012-2;Q64012;A2AU62;A2AU61;A2AU60	RNA-binding protein Raly	5
Fkbp3	1.05619	1.16599	1108863000	2305800000	Q62446	Q62446	Peptidyl-prolyl cis-trans isomerase FKBP3	1
Eif4h	0.602707	1.15783	341886800	519176700	Q9WUK2;Q9WUK2-2	Q9WUK2;Q9WUK2-2	Eukaryotic translation initiation factor 4H	2
Pcbp2	0.552565	1.13286	1170867000	1717300000	Q61990;Q61990-3;Q61990-2;P57722;P57722-2;E9Q7D8;G3UYM5	Q61990;Q61990-3;Q61990-2	Poly(rC)-binding protein 2	7
Zc3h14	0.667953	1.12979	40399010	64186650	Q8BJ05;Q8BJ05-3;Q8BJ05-2;Q8BJ05-4	Q8BJ05;Q8BJ05-3;Q8BJ05-2	Zinc finger CCCH domain-containing protein 14	4
Dhx30	-1.23499	1.12107	113278000	48125680	Q99PU8;Q99PU8-2;Q99PU8-3;D3Z2J3;D3Z1G8;D3YXL7;D3YZM6;D3Z7N8	Q99PU8;Q99PU8-2;Q99PU8-3;D3Z2J3	Putative ATP-dependent RNA helicase DHX30	8
Hnrnpul2	-2.30178	1.11165	112120300	22739500	Q00PI9	Q00PI9	Heterogeneous nuclear ribonucleoprotein U-like protein 2	1
Igf2bp3	-0.61494	1.1072	1255866000	820026800	Q9CPN8	Q9CPN8	Insulin-like growth factor 2 mRNA-binding protein 3	1
Ilf2	-0.524748	1.10546	142096700	98768680	Q9CXY6	Q9CXY6	Interleukin enhancer-binding factor 2	1
Rbm14	0.497846	1.10479	126657300	178853300	Q8C2Q3;Q8C2Q3-2;E9QL13;J3QPT3;J3QN51;J3QQ01	Q8C2Q3;Q8C2Q3-2;E9QL13	RNA-binding protein 14	6
Eif3d	-0.863789	1.09435	149160000	81964530	O70194	O70194	Eukaryotic translation initiation factor 3 subunit D	1
Ddx51	-2.24083	1.0777	68967340	14591000	Q6P9R1	Q6P9R1	ATP-dependent RNA helicase DDX51	1
Pa2g4	0.584666	1.07074	55731680	83580350	P50580;D3YVH7	P50580;D3YVH7	Proliferation-associated protein 2G4	2
Rod1;Ptbp3	-0.817622	1.07055	392349900	222610000	G3UXA6;G8JL74;Q8BHD7;Q8BHD7-2;G3UZ01;G3UY95;G3UXZ8;F7C521;G3UXZ6	G3UXA6;G8JL74;Q8BHD7;Q8BHD7-2;G3UZ01	Polypyrimidine tract-binding protein 3	9
Pabpc4;Gm10110	0.505342	1.06489	296953500	421513400	Q6PHQ9;A3KFU8;A3KFU5;D3Z5M2;Q91YZ8;G5E8X2	Q6PHQ9;A3KFU8;A3KFU5;D3Z5M2;Q91YZ8		6
Gm6793;Gm8991	1.01853	1.06328	174613300	353740000	J3QNY1;Q8BG05-2;B2RXM2;E9Q7H5;A2AL13	J3QNY1;Q8BG05-2;B2RXM2;E9Q7H5		5
Npm1;Gm5611	1.08353	1.05178	2537966000	5378501000	Q61937;Q5SQB0;Q5SQB5;Q9DAY9;E9Q5T3	Q61937;Q5SQB0;Q5SQB5;Q9DAY9;E9Q5T3	Nucleophosmin	5
Tial1	0.700266	1.039	495483200	805063300	Q921W2;P70318;D6RGU1;D3Z3Y4	Q921W2;P70318;D6RGU1	Nucleolysin TIAR	4
Atxn2l	0.187352	1.03232	113770000	129546700	Q7TQH0-2;Q7TQH0-3;Q7TQH0;Q3TGG2;E9Q5Q0;J3QP59	Q7TQH0-2;Q7TQH0-3;Q7TQH0;Q3TGG2;E9Q5Q0	Ataxin-2-like protein	6
Matr3	-0.861029	1.0266	377639900	207913400	Q8K310	Q8K310	Matrin-3	1
Rbm47	-1.26	1.01595	101753600	42486650	Q91WT8;D3YXZ5;Q91WT8-2;D3Z113;Q5YD48;Q5YD48-2;P86049;Q5YD48-3	Q91WT8;D3YXZ5;Q91WT8-2	RNA-binding protein 47	8
Eif4g1	-1.02865	1.01157	209833300	102853400	Q6NZJ6;E9PVC5;E9Q9E1;E9PVC6;Q6NZJ6-2;E9Q770;D3Z439;D3YWM1;D3YWY7	Q6NZJ6;E9PVC5;E9Q9E1;E9PVC6;Q6NZJ6-2	Eukaryotic translation initiation factor 4 gamma 1	9
Pes1	-1.39974	0.996413	28517670	10808160	Q5SQ20;Q9EQ61	Q5SQ20;Q9EQ61	Pescadillo homolog	2
Hnrnpa1	0.584254	0.995902	1337233000	2004866000	Q5EBP8;P49312;J3QK72;P49312-2	Q5EBP8;P49312;J3QK72;P49312-2	Heterogeneous nuclear ribonucleoprotein A1	4
U2af2	0.489804	0.976391	176646700	248056700	P26369;Q3KQM4	P26369;Q3KQM4	Splicing factor U2AF 65 kDa subunit	2
Rps26	-2.60229	0.975818	326116700	53704000	P62855	P62855	40S ribosomal protein S26	1
Tra2b	0.973686	0.974985	41459340	81420020	P62996;F8WJG3	P62996;F8WJG3	Transformer-2 protein homolog beta	2
Fxr1	-1.55824	0.967833	161307300	54774490	Q61584;Q61584-3;Q61584-4;Q61584-6;Q61584-5;Q61584-2;Q61584-7	Q61584;Q61584-3;Q61584-4;Q61584-6;Q61584-5;Q61584-2;Q61584-7	Fragile X mental retardation syndrome-related protein 1	7
Hnrnpu	-2.0029	0.963383	910679400	227213200	Q8VEK3;G3XA10	Q8VEK3;G3XA10	Heterogeneous nuclear ribonucleoprotein U	2
0	1.13946	0.961481	18465660	40679490	Q8CAK3;Q8CAK3-2	Q8CAK3;Q8CAK3-2	UPF0515 protein C19orf66 homolog	2
Pabpn1;Gm20521	1.115	0.955723	89770990	194440000	G3UY42;Q8CCS6;Q8CCS6-2;D3Z5F7;G3UWS5;D3Z055;D3YUB9;G3UX74	G3UY42;Q8CCS6;Q8CCS6-2;D3Z5F7;G3UWS5;D3Z055;D3YUB9	Polyadenylate-binding protein 2	8
U2af1	-1.00803	0.95123	14649400	7284047	G3UW94;Q9D883;Q8BGJ9;E9Q5J3;E9Q1I7;E9PXR5;E9PUZ3;E9Q5Y2;F8WH71;E9Q809;E9PWM2;E9PWX6	G3UW94;Q9D883	Splicing factor U2AF 35 kDa subunit	12
Rps10	-1.29624	0.947858	346669900	141159600	P63325;J3QNI7;Q3UW83	P63325;J3QNI7;Q3UW83	40S ribosomal protein S10	3
Rpl7	-2.96643	0.945682	249170300	31879500	P14148;F6XI62	P14148;F6XI62	60S ribosomal protein L7	2
Rbms2	0.583267	0.913915	90339010	135349300	Q8VC70;E9Q7G6	Q8VC70;E9Q7G6	RNA-binding motif, single-stranded-interacting protein 2	2
Snd1	-0.303499	0.882218	2165001000	1754267000	Q78PY7;Q3TJ56;E9Q3E9	Q78PY7;Q3TJ56	Staphylococcal nuclease domain-containing protein 1	3
Fubp3	0.487986	0.87267	3049467000	4276834000	A2AJ72;Q3TIX6;F7AM43;F6S444;F6W2V3	A2AJ72;Q3TIX6		5
Fastkd2	0.52783	0.862999	59923320	86394980	Q922E6	Q922E6	FAST kinase domain-containing protein 2	1
Ddx1	-0.314469	0.851193	68438990	55035020	Q91VR5	Q91VR5	ATP-dependent RNA helicase DDX1	1
Rpl22	0.480717	0.846047	191990000	267910000	P67984	P67984	60S ribosomal protein L22	1
Rrbp1	-1.38547	0.84377	512813100	196286600	Q99PL5;A2AVJ7;Q99PL5-2;Q99PL5-3;Q99PL5-4;Q99PL5-5;Q99PL5-6;Q99PL5-7;Q99PL5-8;Q99PL5-9;Q99PL5-10;Q99PL5-11;Q99PL5-12	Q99PL5;A2AVJ7	Ribosome-binding protein 1	13
Eif4b	0.528888	0.835076	646549800	932853300	Q8BGD9	Q8BGD9	Eukaryotic translation initiation factor 4B	1
Ilf3	-0.904722	0.803292	296510000	158376600	Q9Z1X4-3;Q9Z1X4;Q9Z1X4-2;Q45VK5	Q9Z1X4-3;Q9Z1X4;Q9Z1X4-2;Q45VK5	Interleukin enhancer-binding factor 3	4
Plec	-0.758681	0.797117	391966800	231666600	E9QN87;Q9QXS1;E9QPE8;Q9QXS1-2;E9QK43;Q9QXS1-8;Q9QXS1-7;Q9QXS1-6;E9QQ00;Q9QXS1-14;E9QL05;Q9QXS1-4;Q9QXS1-16;E9PY96;E9QMZ5;Q9QXS1-3;Q9QXS1-5;E9QLJ5;Q9QXS1-13;Q9QXS1-11;E9QKX4;Q9QXS1-12;Q9QXS1-9;E9Q153;Q9QXS1-10;Q9QXS1-15;E9Q3W4;F6R059;E9Q9J6;E9PW24;Q8R0W0	E9QN87;Q9QXS1;E9QPE8;Q9QXS1-2;E9QK43;Q9QXS1-8;Q9QXS1-7;Q9QXS1-6;E9QQ00;Q9QXS1-14;E9QL05;Q9QXS1-4;Q9QXS1-16;E9PY96;E9QMZ5;Q9QXS1-3;Q9QXS1-5;E9QLJ5;Q9QXS1-13;Q9QXS1-11;E9QKX4;Q9QXS1-12;Q9QXS1-9;E9Q153;Q9QXS1-10;Q9QXS1-15;E9Q3W4	Plectin	31
Ckap4	0.303562	0.770306	860916800	1062534000	Q8BMK4	Q8BMK4	Cytoskeleton-associated protein 4	1
Prrc2c	-1.48092	0.767672	180662700	64724320	Q3TLH4;Q3TLH4-5	Q3TLH4;Q3TLH4-5	Protein PRRC2C	2
Ythdf3	-0.576658	0.74236	41442000	27787500	Q8BYK6-3;Q8BYK6-2;Q8BYK6	Q8BYK6-3;Q8BYK6-2;Q8BYK6	YTH domain family protein 3	3
Eef2	-0.53532	0.738301	85917640	59283660	P58252;A2AH85;O08810;G3UZ34;G3UXK8	P58252	Elongation factor 2	5
Hspa8	-0.268927	0.732108	36259000	30092660	P63017;Q504P4;P17156;D3YW43;D3Z5E2;P16627;P20029;P17879;Q61696	P63017;Q504P4	Heat shock cognate 71 kDa protein	9
Sf3a3	-0.833055	0.731489	11434700	6418749	Q9D554	Q9D554	Splicing factor 3A subunit 3	1
G3bp2	-0.514688	0.719892	108196700	75731670	P97379;P97379-2	P97379;P97379-2	Ras GTPase-activating protein-binding protein 2	2
Rbm3	0.793163	0.705844	525146600	910010100	O89086;Q8BG13	O89086;Q8BG13	Putative RNA-binding protein 3	2
Nop56	-1.40136	0.701662	74322660	28136510	Q9D6Z1;E0CXZ0;F7CHQ7;F7CHP9;F6USW7;A2APD7;F6V095;F6U250	Q9D6Z1;E0CXZ0	Nucleolar protein 56	8
Mrps31	0.162077	0.701624	10917000	12215000	Q61733	Q61733	28S ribosomal protein S31, mitochondrial	1
Igf2bp2	-0.330284	0.691964	617306800	490993300	Q5SF07;Q5SF07-2;A6X8Z3	Q5SF07;Q5SF07-2;A6X8Z3	Insulin-like growth factor 2 mRNA-binding protein 2	3
Nop58	-0.696906	0.690664	154054600	95035350	Q6DFW4	Q6DFW4	Nucleolar protein 58	1
G3bp1	-0.37321	0.690105	324943400	250876600	P97855	P97855	Ras GTPase-activating protein-binding protein 1	1
Cstf2	0.428701	0.679402	23532330	31675010	Q8BIQ5;A2AEK1;Q8BIQ5-2;F6ZKC7;A2AEK3;A2AEJ8	Q8BIQ5;A2AEK1;Q8BIQ5-2	Cleavage stimulation factor subunit 2	6
Larp4	-0.472468	0.656972	73348680	52864650	G3X9Q6;Q8BWW4;E9Q066	G3X9Q6;Q8BWW4;E9Q066	La-related protein 4	3
Fndc3b	-0.288425	0.655642	244419900	200130000	Q6NWW9	Q6NWW9	Fibronectin type III domain-containing protein 3B	1
Hnrnpc	-1.41032	0.632075	2168490000	815846800	Q9Z204-2;Q9Z204;Q9Z204-3;Q9Z204-4;Q9Z204-5;REV__A2AKG8;REV__E9PYJ6;Q8BTF8;E9Q786	Q9Z204-2;Q9Z204;Q9Z204-3;Q9Z204-4;Q9Z204-5	Heterogeneous nuclear ribonucleoproteins C1/C2	9
Atxn2	-0.864048	0.620357	48068020	26409000	E9QM77;O70305;O70305-2;O70305-3;F6U2C2;F7B6X4;F6V8M6	E9QM77;O70305;O70305-2;O70305-3;F6U2C2;F7B6X4	Ataxin-2	7
Hnrnpul1	-0.68069	0.617925	70994330	44291000	Q8VDM6;Q8VDM6-2;Q8VDM6-3	Q8VDM6;Q8VDM6-2	Heterogeneous nuclear ribonucleoprotein U-like protein 1	3
Eif3g	0.583406	0.604082	169040000	253286600	Q9Z1D1	Q9Z1D1	Eukaryotic translation initiation factor 3 subunit G	1
Try10	1.30358	0.599674	295863300	730310100	Q792Z1	Q792Z1		1
Lsm3	0.900921	0.598764	8383148	15653500	P62311	P62311	U6 snRNA-associated Sm-like protein LSm3	1
Larp1	-1.08683	0.587172	222264600	104640700	J3QNB1;Q6ZQ58;Q9D423;Q6ZQ58-2;E9PYM4	J3QNB1;Q6ZQ58	La-related protein 1	5
Dnajc1	1.37351	0.58665	19728990	51117990	Q61712;F6ZL86;F6WEH1	Q61712;F6ZL86;F6WEH1	DnaJ homolog subfamily C member 1	3
Celf1	0.27274	0.565378	1390033000	1679300000	P28659-4;P28659;P28659-3;P28659-2	P28659-4;P28659;P28659-3;P28659-2	CUGBP Elav-like family member 1	4
Ptbp2	0.556724	0.558297	16290770	23962500	Q91Z31-2;Q91Z31	Q91Z31-2;Q91Z31	Polypyrimidine tract-binding protein 2	2
Rpl13a;Rpl13a-ps1	-1.87614	0.528652	174075300	47420010	P19253;E9Q5A0;D3YY61;REV__P52825;REV__A2A8E7	P19253;E9Q5A0;D3YY61	60S ribosomal protein L13a	5
Rps14	-1.42079	0.51629	137824600	51478510	P62264;D3Z7I1;D3YVF4	P62264;D3Z7I1;D3YVF4	40S ribosomal protein S14	3
Rps20	-0.36817	0.511635	119534400	92611000	P60867	P60867	40S ribosomal protein S20	1
Hnrnpl	0.281819	0.509772	1674800000	2036100000	G5E924;Q8R081;G3UY38;G3UY56;G3UYY3	G5E924;Q8R081;G3UY38	Heterogeneous nuclear ribonucleoprotein L	5
Ssb	-0.61239	0.507142	324363400	212170000	P32067;A2AR07;D6RI87;F6SXM5	P32067;A2AR07;D6RI87	Lupus La protein homolog	4
Eif4a1	-0.278929	0.507087	80640320	66463980	P60843;D6RJ11;D6RJ60	P60843	Eukaryotic initiation factor 4A-I	3
Rpl17	0.430018	0.455098	80998700	109125500	Q6ZWZ7;Q9CPR4;B2RY53	Q6ZWZ7;Q9CPR4	60S ribosomal protein L17	3
Purb	0.408029	0.434203	176460100	234140000	O35295;Q8R4E6;Q8R4E6-2	O35295	Transcriptional activator protein Pur-beta	3
Mrps5	-0.364532	0.414321	27516340	21372500	Q99N87;B2FDG7	Q99N87	28S ribosomal protein S5, mitochondrial	2
Caprin1	0.239823	0.413264	233363300	275566600	Q60865;F6YLI0	Q60865	Caprin-1	2
Khdrbs1;Khdrbs2	-1.24862	0.404245	113664000	47835650	Q60749;Q9WU01;Q9WU01-2;Q9R226	Q60749;Q9WU01;Q9WU01-2	KH domain-containing, RNA-binding, signal transduction-associated protein 1;KH domain-containing, RNA-binding, signal transduction-associated protein 2	4
Fbn1	1.22315	0.401057	78485020	183227700	A2AQ53;Q61554	A2AQ53;Q61554	Fibrillin-1	2
R3hdm1	-0.314875	0.391902	56419320	45356640	E9Q9Q2	E9Q9Q2		1
Ptbp1	-0.253118	0.378974	3727767000	3127899000	Q922I7;Q8BGJ5;Q8CB58;P17225;E9QMW9;F7AXP1;F7DCW4;E9Q0W3;B2RU80;E9PZ39;E9Q279	Q922I7;Q8BGJ5;Q8CB58;P17225;E9QMW9	Polypyrimidine tract-binding protein 1	11
Rbm19	-0.54577	0.377361	283546700	194236700	Q8R3C6;Q8R3C6-2	Q8R3C6;Q8R3C6-2	Probable RNA-binding protein 19	2
Hnrnpa3	0.385998	0.376998	114056600	149044900	Q8BG05;A2AL12	Q8BG05;A2AL12	Heterogeneous nuclear ribonucleoprotein A3	2
Ahnak	0.378323	0.375381	20640010	26828500	E9Q616	E9Q616		1
Rpl18	-2.41223	0.358232	871459300	163716700	P35980;G3UZK4;G3UZJ6;G3UYV6;G3UX28	P35980;G3UZK4;G3UZJ6	60S ribosomal protein L18	5
Npm3	0.492725	0.323857	28899500	40664500	Q9CPP0	Q9CPP0	Nucleoplasmin-3	1
Ybx1	-0.403467	0.30136	3129599000	2366100000	P62960;A2BGG7	P62960;A2BGG7	Nuclease-sensitive element-binding protein 1	2
Csde1	-0.113058	0.299886	2881634000	2664433000	Q91W50	Q91W50	Cold shock domain-containing protein E1	1
Pcbp1	0.182331	0.295008	1046694000	1187700000	P60335	P60335	Poly(rC)-binding protein 1	1
Elavl2	0.0738216	0.279878	34926340	36760020	B1AXZ5;B1AXZ4;Q80Y51;Q60899;Q3UR02;B1AXZ6;Q80UJ0;B1AXZ0;H3BLG7;Q60900;Q60900-2;A2A9R4;A2A9R5;A2A9S1	B1AXZ5;B1AXZ4;Q80Y51;Q60899;Q3UR02;B1AXZ6;Q80UJ0;B1AXZ0	ELAV-like protein 2	14
Zcchc24	0.173472	0.269725	12653300	14270000	B2RVL6	B2RVL6	Zinc finger CCHC domain-containing protein 24	1
Rpl22l1	0.352121	0.25874	47615000	60777510	Q9D7S7;Q9D7S7-2	Q9D7S7;Q9D7S7-2	60S ribosomal protein L22-like 1	2
Ubap2l	0.399808	0.258159	12744330	16814000	Q80X50;Q80X50-4;Q80X50-2;Q80X50-3	Q80X50;Q80X50-4;Q80X50-2;Q80X50-3	Ubiquitin-associated protein 2-like	4
Nsun2	-0.365503	0.255901	121379700	94214650	Q1HFZ0;H3BKN0;Q1HFZ0-2;H3BJF3	Q1HFZ0;H3BKN0;Q1HFZ0-2	tRNA (cytosine(34)-C(5))-methyltransferase	4
Hist1h4a	-1.84847	0.216084	300645200	83485020	P62806	P62806	Histone H4	1
Csda	-0.39377	0.212743	79549340	60548030	Q9JKB3	Q9JKB3	DNA-binding protein A	1
Ewsr1	0.20162	0.208595	40877340	47008490	Q5SUS9;Q61545;Q5SUT0;Q5SUS8	Q5SUS9;Q61545;Q5SUT0	RNA-binding protein EWS	4
Hnrnpr	0.151894	0.200816	888816600	987499600	Q8VHM5;A2AW41;A2AW40	Q8VHM5;A2AW41		3
Mettl16	-0.258287	0.182514	24454000	20445500	Q5SW15;Q9CQG2;Q9CQG2-2;F8WHZ7	Q5SW15;Q9CQG2;Q9CQG2-2	Methyltransferase-like protein 16	4
Fbn2	0.28032	0.126753	48610350	59035530	Q61555	Q61555	Fibrillin-2	1
H2afy2	-2.61881	0.112956	91483150	14893670	Q8CCK0;Q9QZQ8;Q9QZQ8-2	Q8CCK0	Core histone macro-H2A.2	3
Alyref	-1.44777	0.100969	408089000	149600000	O08583;O08583-2;G3X9I4;Q9JJW6;Q9JJW6-2	O08583;O08583-2	THO complex subunit 4	5
Nono	-0.0808674	0.0964395	435993300	412226900	Q99K48;Q99K48-2;B1AXT0	Q99K48	Non-POU domain-containing octamer-binding protein	3
Dsp	-1.05209	0.0917533	30157280	14543950	E9Q557;E9PZW0	E9Q557;E9PZW0	Desmoplakin	2
Hdlbp	-0.0310316	0.0875596	4375034000	4281935000	Q8VDJ3	Q8VDJ3	Vigilin	1
Rps5	0.125644	0.0836175	84928340	92656380	Q91V55;D3YYM6;P97461	Q91V55;D3YYM6;P97461	40S ribosomal protein S5;40S ribosomal protein S5, N-terminally processed	3
Msi2	0.0449214	0.079229	53347320	55034510	Q920Q6;Q920Q6-2;Q920Q6-3;B1AT10;B1AT13;Q61474;F8WJA5;Q61474-2	Q920Q6;Q920Q6-2;Q920Q6-3;B1AT10	RNA-binding protein Musashi homolog 2	8
Pura	0.222891	0.0587225	190503300	222330700	P42669	P42669	Transcriptional activator protein Pur-alpha	1
Mphosph10	0.0751424	0.0435098	18841330	19848670	Q810V0	Q810V0	U3 small nucleolar ribonucleoprotein protein MPP10	1
Gnb2l1	0.0115987	0.027945	36111990	36403500	P68040	P68040	Guanine nucleotide-binding protein subunit beta-2-like 1	1
Fus	-0.297076	0.00158097	197640900	160860000	P56959;Q8CFQ9;G3UXT7;Q91VQ2;G3UZD2	P56959;Q8CFQ9;G3UXT7	RNA-binding protein FUS	5
Ddx52	#VALUE!	0	428300	NaN	Q8K301	Q8K301	Probable ATP-dependent RNA helicase DDX52	1
Cpsf4	#VALUE!	0	477150	NaN	E0CXT7;B2LVG6;B2LVG5;Q8BQZ5-2;Q8BQZ5-3;Q8BQZ5;M0QWM8	E0CXT7;B2LVG6;B2LVG5;Q8BQZ5-2;Q8BQZ5-3;Q8BQZ5;M0QWM8	Cleavage and polyadenylation specificity factor subunit 4	7
Mrps24	#VALUE!	0	499660	NaN	Q9CQV5	Q9CQV5	28S ribosomal protein S24, mitochondrial	1
Helz	#VALUE!	0	585080	NaN	Q6DFV5-3;Q6DFV5;A2AAU3;Q6DFV5-2;A2AAU5	Q6DFV5-3;Q6DFV5;A2AAU3;Q6DFV5-2;A2AAU5	Probable helicase with zinc finger domain	5
Mrpl45	#VALUE!	0	735590	NaN	Q9D0Q7	Q9D0Q7	39S ribosomal protein L45, mitochondrial	1
Ptcd1	#VALUE!	0	820040	NaN	Q8C2E4	Q8C2E4	Pentatricopeptide repeat-containing protein 1	1
Srrt	#VALUE!	0	839700	NaN	Q99MR6;Q99MR6-2;Q99MR6-4;Q99MR6-3	Q99MR6;Q99MR6-2;Q99MR6-4;Q99MR6-3	Serrate RNA effector molecule homolog	4
Pdlim5	#VALUE!	0	855250	NaN	Q8CI51;Q8CI51-2;E9Q8P5;F8WJI6;Q8CI51-3;Q9CRA2	Q8CI51;Q8CI51-2;E9Q8P5;F8WJI6;Q8CI51-3;Q9CRA2	PDZ and LIM domain protein 5	6
Drg1	#VALUE!	0	928270	NaN	P32233	P32233	Developmentally-regulated GTP-binding protein 1	1
Ifit1;2010002M12Rik	#VALUE!	0	952570	NaN	Q64282;Q3U687	Q64282;Q3U687	Interferon-induced protein with tetratricopeptide repeats 1	2
Tardbp	#VALUE!	0	969400	NaN	Q8R0B4	Q8R0B4		1
Gkap1	#VALUE!	0	1011701	NaN	Q9JMB0	Q9JMB0	G kinase-anchoring protein 1	1
Ddx46	#VALUE!	0	1035100	NaN	Q569Z5;F8WHR6;Q569Z5-2	Q569Z5;F8WHR6;Q569Z5-2	Probable ATP-dependent RNA helicase DDX46	3
Fcf1	#VALUE!	0	1114101	NaN	Q9CTH6;E9Q186	Q9CTH6;E9Q186	rRNA-processing protein FCF1 homolog	2
Sf1	#VALUE!	0	1188999	NaN	Q64213;Q64213-3;D3YZD0;D3YZC9;E9Q4Q2;Q64213-2;D3YVH4;F8WHF9;D6RDB7	Q64213;Q64213-3;D3YZD0;D3YZC9;E9Q4Q2;Q64213-2;D3YVH4;F8WHF9;D6RDB7	Splicing factor 1	9
Rps19bp1	#VALUE!	0	1199900	NaN	Q8C6B9	Q8C6B9	Active regulator of SIRT1	1
Utp11l	#VALUE!	0	1389400	NaN	Q9CZJ1	Q9CZJ1	Probable U3 small nucleolar RNA-associated protein 11	1
Skiv2l2	#VALUE!	0	1434799	NaN	Q9CZU3	Q9CZU3	Superkiller viralicidic activity 2-like 2	1
Eri3	#VALUE!	0	1506399	NaN	Q8C460;Q8C460-2	Q8C460;Q8C460-2	ERI1 exoribonuclease 3	2
Nudt21	#VALUE!	0	1549500	NaN	Q9CQF3	Q9CQF3	Cleavage and polyadenylation specificity factor subunit 5	1
Secisbp2	#VALUE!	0	1632799	NaN	Q3U1C4	Q3U1C4		1
Ccdc124	#VALUE!	0	1695699	NaN	Q9D8X2	Q9D8X2	Coiled-coil domain-containing protein 124	1
Dhx37	#VALUE!	0	1731399	NaN	Q6NZL1	Q6NZL1		1
Aatf	2.10644	0	1791601	7715096	Q9JKX4;Q9JKX4-3;Q9JKX4-2	Q9JKX4;Q9JKX4-3;Q9JKX4-2	Protein AATF	3
Rtp4	#VALUE!	0	1813101	NaN	Q9ER80	Q9ER80	Receptor-transporting protein 4	1
Rnf213	#VALUE!	0	1866800	NaN	F7A6H4;E9Q555	F7A6H4;E9Q555	E3 ubiquitin-protein ligase RNF213	2
Rbm25	#VALUE!	0	1985701	NaN	B2RY56	B2RY56	RNA-binding protein 25	1
Eif3b	#VALUE!	0	2042000	NaN	Q8JZQ9	Q8JZQ9	Eukaryotic translation initiation factor 3 subunit B	1
Utp6	#VALUE!	0	2060999	NaN	Q8VCY6	Q8VCY6	U3 small nucleolar RNA-associated protein 6 homolog	1
Rps27	#VALUE!	0	2098800	NaN	Q6ZWU9	Q6ZWU9	40S ribosomal protein S27	1
Srrm1	#VALUE!	0	2111402	NaN	Q52KI8;E9PUK6;A2A8V9;A2A8V8;E9QKA4;Q52KI8-2;A2A983;F6T4M4	Q52KI8;E9PUK6;A2A8V9;A2A8V8;E9QKA4;Q52KI8-2;A2A983;F6T4M4	Serine/arginine repetitive matrix protein 1	8
Eif3h	#VALUE!	0	2153899	NaN	Q91WK2	Q91WK2	Eukaryotic translation initiation factor 3 subunit H	1
0	#VALUE!	0	2160401	NaN	A3KGF9	A3KGF9	Uncharacterized protein C15orf52 homolog	1
Gltscr2	#VALUE!	0	2175799	NaN	Q8BK35	Q8BK35		1
Fam98b	#VALUE!	0	2188001	NaN	Q80VD1	Q80VD1	Protein FAM98B	1
Phf5a	#VALUE!	0	2189500	NaN	P83870	P83870	PHD finger-like domain-containing protein 5A	1
Elavl4	#VALUE!	0	2279800	NaN	Q61701;A2A9S0;Q8BVA9;A2A9R6;A2A9R8;A2A9S2;Q61701-2;A2A9S3	Q61701;A2A9S0;Q8BVA9;A2A9R6;A2A9R8;A2A9S2;Q61701-2;A2A9S3	ELAV-like protein 4	8
Prrc2b	#VALUE!	0	2297701	NaN	F8WHT3;Q7TPM1;F7AYW2;A2AN33;Q7TPM1-2;F6Q3E1	F8WHT3;Q7TPM1;F7AYW2	Protein PRRC2B	6
Rbm42	#VALUE!	0	2303300	NaN	Q91V81-2;Q91V81;D3YYW8	Q91V81-2;Q91V81;D3YYW8	RNA-binding protein 42	3
Cpeb2;Cpeb3	#VALUE!	0	2312399	NaN	E9Q969;E9Q5X2;Q7TN99;Q7TN99-2;D3Z5R9;Q7TN99-3;D3Z1R6;Q7TN99-4;D3YUJ4;Q812E0;F6T0J8;Q7TN99-5	E9Q969;E9Q5X2;Q7TN99;Q7TN99-2;D3Z5R9;Q7TN99-3;D3Z1R6;Q7TN99-4;D3YUJ4;Q812E0;F6T0J8;Q7TN99-5	Cytoplasmic polyadenylation element-binding protein 3;Cytoplasmic polyadenylation element-binding protein 2	12
AI837181;Bles03	#VALUE!	0	2426500	NaN	E9QNR6;Q8VD62	E9QNR6;Q8VD62	UPF0696 protein C11orf68 homolog	2
Tra2a	#VALUE!	0	2441199	NaN	E9QP00;Q6PFR5	E9QP00;Q6PFR5	Transformer-2 protein homolog alpha	2
Ppp1r10	#VALUE!	0	2454799	NaN	Q80W00;Q80W00-2	Q80W00;Q80W00-2	Serine/threonine-protein phosphatase 1 regulatory subunit 10	2
Son	#VALUE!	0	2598700	NaN	H9KV00;Q9QX47;Q9QX47-3;H9KV15;H9KV01;Q9QX47-4;Q9QX47-2	H9KV00;Q9QX47;Q9QX47-3;H9KV15;H9KV01;Q9QX47-4;Q9QX47-2	Protein SON	7
Tnrc6b	#VALUE!	0	2634100	NaN	Q8BKI2;Q8BKI2-2	Q8BKI2;Q8BKI2-2	Trinucleotide repeat-containing gene 6B protein	2
Rps28	#VALUE!	0	2648101	NaN	P62858;G3UYV7;J3QNN8	P62858;G3UYV7;J3QNN8	40S ribosomal protein S28	3
Dnttip2	#VALUE!	0	2867300	NaN	Q8R2M2	Q8R2M2	Deoxynucleotidyltransferase terminal-interacting protein 2	1
Tgm3	#VALUE!	0	2931299	NaN	Q08189	Q08189	Protein-glutamine gamma-glutamyltransferase E;Protein-glutamine gamma-glutamyltransferase E 50 kDa catalytic chain;Protein-glutamine gamma-glutamyltransferase E 27 kDa non-catalytic chain	1
Dsg1b;Dsg1a;Dsg1c	#VALUE!	0	2958200	NaN	Q7TSF1;Q61495;Q7TSF0;Q7TSF0-2	Q7TSF1;Q61495;Q7TSF0;Q7TSF0-2	Desmoglein-1-beta;Desmoglein-1-alpha;Desmoglein-1-gamma	4
Wdr3	#VALUE!	0	2963751	NaN	Q8BHB4	Q8BHB4	WD repeat-containing protein 3	1
Rpl9;Rpl9-ps6	#VALUE!	0	2975502	NaN	P51410;G3UW34;D3Z629	P51410;G3UW34;D3Z629	60S ribosomal protein L9	3
Rpf1	#VALUE!	0	3043798	NaN	Q7TND5	Q7TND5	Ribosome production factor 1	1
Eif2c1;Eif2c3;Eif2c4	#VALUE!	0	3062600	NaN	Q8CJG1;Q8CJF9;H3BJ70;Q8CJF8;Q8CJF8-2	Q8CJG1;Q8CJF9;H3BJ70;Q8CJF8;Q8CJF8-2	Protein argonaute-1;Protein argonaute-3;Protein argonaute-4	5
Mex3b;Mex3c	#VALUE!	0	3199399	NaN	Q69Z36;F8WJD6;Q05A36	Q69Z36;F8WJD6;Q05A36	RNA-binding protein MEX3B;RNA-binding protein MEX3C	3
Vim	#VALUE!	0	3285602	NaN	P20152	P20152	Vimentin	1
Bysl	#VALUE!	0	3393498	NaN	O54825	O54825	Bystin	1
Eprs	#VALUE!	0	3484599	NaN	Q8CGC7	Q8CGC7	Bifunctional glutamate/proline--tRNA ligase;Glutamate--tRNA ligase;Proline--tRNA ligase	1
Safb	#VALUE!	0	3586301	NaN	D3YXK2	D3YXK2	Scaffold attachment factor B1	1
Srbd1	#VALUE!	0	3707501	NaN	Q497V5;F8WGW3;Q497V5-2	Q497V5;F8WGW3;Q497V5-2	S1 RNA-binding domain-containing protein 1	3
Usp10	#VALUE!	0	3713702	NaN	P52479-2;P52479	P52479-2;P52479	Ubiquitin carboxyl-terminal hydrolase 10	2
Lgals3	#VALUE!	0	3868634	NaN	P16110;Q8C253	P16110;Q8C253	Galectin-3	2
Rbm8a	#VALUE!	0	3877999	NaN	Q9CWZ3;Q9CWZ3-2	Q9CWZ3;Q9CWZ3-2	RNA-binding protein 8A	2
Cherp	#VALUE!	0	3965002	NaN	G5E8I8;Q8CGZ0	G5E8I8;Q8CGZ0	Calcium homeostasis endoplasmic reticulum protein	2
Bicc1	#VALUE!	0	3994301	NaN	Q99MQ1;G3X8S6;Q99MQ1-2	Q99MQ1;G3X8S6;Q99MQ1-2	Protein bicaudal C homolog 1	3
Cpsf6	#VALUE!	0	4073050	NaN	H3BJW3;H3BJ30;Q6NVF9;H3BKW0	H3BJW3;H3BJ30;Q6NVF9;H3BKW0	Cleavage and polyadenylation specificity factor subunit 6	4
Akap8l	#VALUE!	0	4073303	NaN	Q9R0L7;Q5RL57	Q9R0L7;Q5RL57	A-kinase anchor protein 8-like	2
Bzw1	#VALUE!	0	4078702	NaN	Q9CQC6	Q9CQC6	Basic leucine zipper and W2 domain-containing protein 1	1
Usp36	#VALUE!	0	4119199	NaN	B1AQJ2;B0QZF8	B1AQJ2;B0QZF8	Ubiquitin carboxyl-terminal hydrolase 36	2
Nom1	#VALUE!	0	4233099	NaN	Q3UFM5	Q3UFM5	Nucleolar MIF4G domain-containing protein 1	1
Spats2	#VALUE!	0	4265599	NaN	Q8K1N4;Q8K1N4-2	Q8K1N4;Q8K1N4-2	Spermatogenesis-associated serine-rich protein 2	2
Mrpl32	#VALUE!	0	4290802	NaN	Q9DCI9	Q9DCI9	39S ribosomal protein L32, mitochondrial	1
Prdx1;Prdx4	#VALUE!	0	4507934	NaN	P35700;B1AXW6;B1AXW5;O08807;B1AZS9;B1AXW4	P35700;B1AXW6;B1AXW5;O08807;B1AZS9;B1AXW4	Peroxiredoxin-1;Peroxiredoxin-4	6
Kif1b;Kif1a	#VALUE!	0	4574034	NaN	A2AH75;Q60575-3;Q60575;Q60575-2;E9Q9G6;Q6TA13;G3UW47;P33173;E9QAN4	A2AH75;Q60575-3;Q60575;Q60575-2;E9Q9G6;Q6TA13;G3UW47;P33173;E9QAN4	Kinesin-like protein KIF1B;Kinesin-like protein KIF1A	9
Nsa2	#VALUE!	0	4640103	NaN	Q9CR47	Q9CR47	Ribosome biogenesis protein NSA2 homolog	1
Col1a1	#VALUE!	0	4689799	NaN	P11087;P11087-2	P11087;P11087-2	Collagen alpha-1(I) chain	2
Rpl23	#VALUE!	0	4696103	NaN	P62830	P62830	60S ribosomal protein L23	1
Raver1	#VALUE!	0	4778899	NaN	Q9CW46;Q9CW46-2	Q9CW46;Q9CW46-2	Ribonucleoprotein PTB-binding 1	2
Rexo4	#VALUE!	0	4875900	NaN	Q6PAQ4;A2ALB2;A2ALB1	Q6PAQ4;A2ALB2;A2ALB1	RNA exonuclease 4	3
Eif5b	#VALUE!	0	4925899	NaN	Q05D44	Q05D44	Eukaryotic translation initiation factor 5B	1
Ascc3	#VALUE!	0	4937900	NaN	E9PZJ8;E9PZJ8-2	E9PZJ8;E9PZJ8-2	Activating signal cointegrator 1 complex subunit 3	2
Tmpo	#VALUE!	0	4959903	NaN	Q61033;Q61029;Q61029-3;Q61029-2;Q61029-4;Q61033-2	Q61033;Q61029;Q61029-3;Q61029-2;Q61029-4;Q61033-2	Lamina-associated polypeptide 2, isoforms alpha/zeta;Lamina-associated polypeptide 2, isoforms beta/delta/epsilon/gamma	6
Ppil4	#VALUE!	0	4989803	NaN	Q9CXG3	Q9CXG3	Peptidyl-prolyl cis-trans isomerase-like 4	1
Flna	#VALUE!	0	5010599	NaN	Q8BTM8;B7FAU9;B7FAV1;D3Z576;Q8VHX6;D3YW87;Q8VHX6-2;F6XC15;Q8BTM8-2	Q8BTM8;B7FAU9;B7FAV1	Filamin-A	9
Mrpl3	#VALUE!	0	5075800	NaN	Q99N95;D3Z456;F6W7C7	Q99N95;D3Z456;F6W7C7	39S ribosomal protein L3, mitochondrial	3
Mrps35	#VALUE!	0	5196200	NaN	Q8BJZ4	Q8BJZ4	28S ribosomal protein S35, mitochondrial	1
Nol8	#VALUE!	0	5241300	NaN	E9QKD1;Q3UHX0	E9QKD1;Q3UHX0	Nucleolar protein 8	2
Gemin5	#VALUE!	0	5243798	NaN	E9PUU4;Q8BX17;A2AFQ9	E9PUU4;Q8BX17;A2AFQ9	Gem-associated protein 5	3
Mex3d	#VALUE!	0	5317498	NaN	E9PUA0;Q3UE17;D3YTR3;Q3UE17-2	E9PUA0;Q3UE17;D3YTR3;Q3UE17-2	RNA-binding protein MEX3D	4
Mrpl9	#VALUE!	0	5365801	NaN	Q3UK02;Q99N94	Q3UK02;Q99N94	39S ribosomal protein L9, mitochondrial	2
Ddx39a	#VALUE!	0	5530401	NaN	Q8VDW0;D6RHT5;Q8VDW0-2	Q8VDW0	ATP-dependent RNA helicase DDX39A	3
Fastk	#VALUE!	0	5760901	NaN	Q8C725;D3Z4M5;Q9JIX9;E9QA06	Q8C725;D3Z4M5;Q9JIX9	Fas-activated serine/threonine kinase	4
Pdia3	#VALUE!	0	5819949	NaN	P27773	P27773	Protein disulfide-isomerase A3	1
Srsf4	#VALUE!	0	5853799	NaN	Q542V3;Q8VE97;A2A837	Q542V3;Q8VE97;A2A837	Serine/arginine-rich splicing factor 4	3
Rbpms	#VALUE!	0	5904450	NaN	Q9WVB0-2;Q9WVB0	Q9WVB0-2;Q9WVB0	RNA-binding protein with multiple splicing	2
Srsf11	#VALUE!	0	5911397	NaN	E9Q6E5;Q3UIX4;D3Z4B0;Q8BV04;B7ZNC5;D6RE22;F6TN80;F6X2U6	E9Q6E5;Q3UIX4;D3Z4B0		8
Lyar	#VALUE!	0	5951303	NaN	Q08288;D3Z345;D3Z7N3;D3Z5X8;D3YU83;D3Z009	Q08288;D3Z345;D3Z7N3;D3Z5X8;D3YU83;D3Z009	Cell growth-regulating nucleolar protein	6
Lgals1	0.41738	0	6139047	8198695	P16045	P16045	Galectin-1	1
Ccdc72	#VALUE!	0	6157101	NaN	Q8K003	Q8K003	Coiled-coil domain-containing protein 72	1
Tcf25	#VALUE!	0	6161196	NaN	Q8R3L2;Q8R3L2-5;Q8R3L2-2;Q8R3L2-3;Q8R3L2-4	Q8R3L2;Q8R3L2-5;Q8R3L2-2;Q8R3L2-3;Q8R3L2-4	Transcription factor 25	5
Rps27l	#VALUE!	0	6189297	NaN	D3YYB0;Q6ZWY3;D6RH49	D3YYB0;Q6ZWY3;D6RH49	40S ribosomal protein S27;40S ribosomal protein S27-like	3
Rpf2	#VALUE!	0	6230702	NaN	Q9JJ80;G3X926	Q9JJ80;G3X926	Ribosome production factor 2 homolog	2
Rbm38;Rbm24	1.60924	0	6326300	19300990	Q62176;D3Z4I3;G3UWX7;G3UXG4	Q62176;D3Z4I3;G3UWX7;G3UXG4	RNA-binding protein 38;RNA-binding protein 24	4
Eif5a;Eif5a2	#VALUE!	0	6341252	NaN	P63242;Q8BGY2;J3QPS8	P63242;Q8BGY2	Eukaryotic translation initiation factor 5A-1;Eukaryotic translation initiation factor 5A-2	3
Tmem214	#VALUE!	0	6462269	NaN	Q8BM55;D3Z6S1;Q8BM55-2;Q8BM55-3	Q8BM55;D3Z6S1	Transmembrane protein 214	4
Ythdc2	#VALUE!	0	6543100	NaN	B2RR83	B2RR83	Probable ATP-dependent RNA helicase YTHDC2	1
Abcf1	#VALUE!	0	6564101	NaN	Q6P542	Q6P542	ATP-binding cassette sub-family F member 1	1
Noc2l	#VALUE!	0	6568847	NaN	J3QK52;Q9WV70;Q8BHX6	J3QK52;Q9WV70;Q8BHX6	Nucleolar complex protein 2 homolog	3
Ppig	#VALUE!	0	6572698	NaN	A2AR02;A2AR01	A2AR02;A2AR01	Peptidyl-prolyl cis-trans isomerase G;Peptidyl-prolyl cis-trans isomerase	2
Mrpl2	#VALUE!	0	6577896	NaN	Q9D773;B1B1D8;B1B1D7	Q9D773;B1B1D8;B1B1D7	39S ribosomal protein L2, mitochondrial	3
Nol7	#VALUE!	0	6737904	NaN	Q9D7Z3;Q9D7Z3-2	Q9D7Z3;Q9D7Z3-2	Nucleolar protein 7	2
Dhx57	#VALUE!	0	6844850	NaN	Q6P5D3;Q6P5D3-2;Q6P5D3-3;Q6P5D3-4	Q6P5D3;Q6P5D3-2;Q6P5D3-3	Putative ATP-dependent RNA helicase DHX57	4
Nxf1	#VALUE!	0	7271737	NaN	Q99JX7	Q99JX7	Nuclear RNA export factor 1	1
Ankrd17;Ankhd1	#VALUE!	0	7322802	NaN	Q99NH0;E9QKG6;E9Q804;Q99NH0-3;Q99NH0-2;E9PUR0;E9Q1M6;F7C545	Q99NH0;E9QKG6;E9Q804;Q99NH0-3;Q99NH0-2;E9PUR0;E9Q1M6	Ankyrin repeat domain-containing protein 17	8
Mrps7	#VALUE!	0	7340998	NaN	Q80X85	Q80X85	28S ribosomal protein S7, mitochondrial	1
Pum2	#VALUE!	0	7374002	NaN	Q80U58	Q80U58	Pumilio homolog 2	1
Hsp90ab1;Hsp90aa1	#VALUE!	0	7418400	NaN	P11499;P07901;P08113;B7ZC50;E9Q3D6;E9PX27;D3Z1R1	P11499;P07901	Heat shock protein HSP 90-beta;Heat shock protein HSP 90-alpha	7
Eif1ax;Eif1a	#VALUE!	0	7428453	NaN	Q8BMJ3;Q60872	Q8BMJ3;Q60872	Eukaryotic translation initiation factor 1A, X-chromosomal;Eukaryotic translation initiation factor 1A	2
Bop1	#VALUE!	0	7611400	NaN	P97452	P97452	Ribosome biogenesis protein BOP1	1
Zfp36l2	#VALUE!	0	7671699	NaN	B9EIF6;P23949	B9EIF6;P23949	Zinc finger protein 36, C3H1 type-like 2	2
Rps19	#VALUE!	0	7704703	NaN	D3Z722;D3Z5R8;Q9CZX8;D3YUG3;D3YUT3	D3Z722;D3Z5R8;Q9CZX8;D3YUG3;D3YUT3	40S ribosomal protein S19	5
Nhp2	#VALUE!	0	7764000	NaN	Q9CRB2	Q9CRB2	H/ACA ribonucleoprotein complex subunit 2	1
Nol6	#VALUE!	0	7836547	NaN	Q8R5K4;Q8R5K4-2	Q8R5K4;Q8R5K4-2	Nucleolar protein 6	2
Mfap2	1.83217	0	7912703	28174980	Q99PM0;P55002	Q99PM0;P55002	Microfibrillar-associated protein 2	2
Adar	#VALUE!	0	7961097	NaN	Q99MU3;Q99MU3-2;Q99MU3-5;Q99MU3-4;Q99MU3-3	Q99MU3;Q99MU3-2;Q99MU3-5;Q99MU3-4;Q99MU3-3	Double-stranded RNA-specific adenosine deaminase	5
Rbm5	#VALUE!	0	8103949	NaN	Q91YE7;Q91YE7-2	Q91YE7;Q91YE7-2	RNA-binding protein 5	2
Rnps1	#VALUE!	0	8164104	NaN	Q99M28;J3QK23;Q99M28-2	Q99M28;J3QK23;Q99M28-2	RNA-binding protein with serine-rich domain 1	3
Habp4	#VALUE!	0	8277603	NaN	E9QKB2;Q9JKS5	E9QKB2;Q9JKS5	Intracellular hyaluronan-binding protein 4	2
Rps15a	#VALUE!	0	8327899	NaN	P62245;F8WJ41;D3YVB4;D3Z712	P62245;F8WJ41;D3YVB4;D3Z712	40S ribosomal protein S15a	4
Msn	0.247738	0	8380967	9951094	P26041;P26040;P26043;Q7TSG6	P26041	Moesin	4
R3hdm2	#VALUE!	0	8417704	NaN	Q80TM6;Q80TM6-3;Q148X5;Q80TM6-4;Q80TM6-2;E9Q9D6;F6Z9T5	Q80TM6;Q80TM6-3;Q148X5;Q80TM6-4;Q80TM6-2;E9Q9D6;F6Z9T5	R3H domain-containing protein 2	7
Naa38	1.64311	0	8439902	26360990	Q6ZWM4	Q6ZWM4	N-alpha-acetyltransferase 38, NatC auxiliary subunit	1
Bclaf1	#VALUE!	0	8548069	NaN	Q8K019;Q8K019-2;F8WI22;Q8K019-3	Q8K019;Q8K019-2;F8WI22;Q8K019-3	Bcl-2-associated transcription factor 1	4
Akap1	0.366942	0	8582399	11068000	O08715-4;O08715;O08715-6;O08715-3;O08715-5;O08715-2	O08715-4;O08715;O08715-6;O08715-3;O08715-5;O08715-2	A-kinase anchor protein 1, mitochondrial	6
Larp7;Gm12666	#VALUE!	0	8621406	NaN	Q05CL8;A2AMD0	Q05CL8;A2AMD0	La-related protein 7	2
Sec61a1;Sec61a2	#VALUE!	0	8638253	NaN	P61620;Q9JLR1;A2ATT9	P61620;Q9JLR1;A2ATT9	Protein transport protein Sec61 subunit alpha isoform 1;Protein transport protein Sec61 subunit alpha isoform 2	3
Slc39a7	#VALUE!	0	8735301	NaN	Q31125	Q31125	Zinc transporter SLC39A7	1
Sumo3;Sumo2	#VALUE!	0	8902901	NaN	G3UZA7;Q9Z172;Q9Z172-2;G3UWX9;P61957;G3UWI9;G3UZ60;D3Z794;H7BWX9;G3UZX6	G3UZA7;Q9Z172;Q9Z172-2;G3UWX9;P61957;G3UWI9;G3UZ60;D3Z794;H7BWX9;G3UZX6	Small ubiquitin-related modifier 3;Small ubiquitin-related modifier 2	10
Imp3	#VALUE!	0	9056997	NaN	Q921Y2	Q921Y2	U3 small nucleolar ribonucleoprotein protein IMP3	1
Diexf	#VALUE!	0	9126400	NaN	Q8BTT6	Q8BTT6	Digestive organ expansion factor homolog	1
Krr1	#VALUE!	0	9178200	NaN	Q8BGA5;G3UZA0	Q8BGA5;G3UZA0	KRR1 small subunit processome component homolog	2
Gm6316;Gm7293;Gapdh;Gapdhs;Gm5069;Gm7251	#VALUE!	0	9660706	NaN	D3YU05;D3YYI5;M0QWZ0;P16858;Q64467;D3Z0Z9;F6UT49;F8WJL5	D3YU05;D3YYI5;M0QWZ0;P16858;Q64467;D3Z0Z9;F6UT49;F8WJL5	Glyceraldehyde-3-phosphate dehydrogenase;Glyceraldehyde-3-phosphate dehydrogenase, testis-specific	8
Gnl2	#VALUE!	0	9674198	NaN	Q99LH1	Q99LH1	Nucleolar GTP-binding protein 2	1
Rbmx	#VALUE!	0	9687398	NaN	Q9WV02;A2AFI3;Q9WV02-2;A2AFI4	Q9WV02;A2AFI3;Q9WV02-2;A2AFI4	RNA-binding motif protein, X chromosome;RNA-binding motif protein, X chromosome, N-terminally processed	4
Cstf2t	#VALUE!	0	9832003	NaN	Q8C7E9	Q8C7E9	Cleavage stimulation factor subunit 2 tau variant	1
Eif4a3;Gm5576	#VALUE!	0	9845767	NaN	Q91VC3;E9PV04;A2AFK7	Q91VC3;E9PV04;A2AFK7	Eukaryotic initiation factor 4A-III	3
D10Wsu52e	#VALUE!	0	9955502	NaN	Q99LF4	Q99LF4	tRNA-splicing ligase RtcB homolog	1
Zcchc3	#VALUE!	0	9957101	NaN	Q8BPK2	Q8BPK2		1
Mex3a	#VALUE!	0	10055600	NaN	G3UYU0	G3UYU0		1
Rbm6	-0.816571	0	10069400	5717303	Q3ULB0	Q3ULB0		1
Dhx8	-1.69089	0	10152530	3144602	A2A4P0;A2A4N9	A2A4P0;A2A4N9	ATP-dependent RNA helicase DHX8	2
Fop;2500003M10Rik	#VALUE!	0	10196000	NaN	Q9CY57;Q9CY57-2;E9PW20;Q9CY57-3;D3Z7T7;Q9CY57-4;Q9CY57-5;D3YZA1	Q9CY57;Q9CY57-2;E9PW20;Q9CY57-3;D3Z7T7;Q9CY57-4;Q9CY57-5;D3YZA1	Friend of PRMT1 protein	8
Eif4a2	#VALUE!	0	10295000	NaN	P10630-2;P10630;Q8BTU6;E9Q561	P10630-2;P10630;Q8BTU6;E9Q561	Eukaryotic initiation factor 4A-II	4
Rbm27	#VALUE!	0	10323210	NaN	Q5SFM8;Q5SFM8-2;Q5SFM8-3	Q5SFM8;Q5SFM8-2;Q5SFM8-3	RNA-binding protein 27	3
Eif3e	#VALUE!	0	10343460	NaN	P60229	P60229	Eukaryotic translation initiation factor 3 subunit E	1
Sltm	#VALUE!	0	10383000	NaN	Q8CH25;Q8CH25-2	Q8CH25;Q8CH25-2	SAFB-like transcription modulator	2
Hist1h1b	#VALUE!	0	10811010	NaN	P43276	P43276	Histone H1.5	1
Ccdc137	#VALUE!	0	10853800	NaN	Q8R0K4;H3BLI5	Q8R0K4;H3BLI5	Coiled-coil domain-containing protein 137	2
Cyb5r3	#VALUE!	0	10866900	NaN	F2Z456;Q9DCN2;Q9DCN2-2;F2Z3V0	F2Z456;Q9DCN2;Q9DCN2-2;F2Z3V0	NADH-cytochrome b5 reductase 3;NADH-cytochrome b5 reductase 3 membrane-bound form;NADH-cytochrome b5 reductase 3 soluble form	4
Pdia6	#VALUE!	0	10950000	NaN	Q3TML0;Q922R8	Q3TML0;Q922R8	Protein disulfide-isomerase A6	2
Eif3l	#VALUE!	0	10972600	NaN	Q8QZY1	Q8QZY1	Eukaryotic translation initiation factor 3 subunit L	1
Ddx24	#VALUE!	0	11015900	NaN	F8WJA0;Q9ESV0	F8WJA0;Q9ESV0	ATP-dependent RNA helicase DDX24	2
Csrp1	#VALUE!	0	11028050	NaN	P97315	P97315	Cysteine and glycine-rich protein 1	1
Wdr75	#VALUE!	0	11171010	NaN	Q3U821	Q3U821		1
Ddx50	#VALUE!	0	11239550	NaN	Q99MJ9	Q99MJ9	ATP-dependent RNA helicase DDX50	1
Rpl21;Rpl21-ps6	#VALUE!	0	11366000	NaN	O09167;Q9CQM8;D3YX47	O09167;Q9CQM8;D3YX47	60S ribosomal protein L21	3
Surf6	#VALUE!	0	11496640	NaN	P70279;A2ALA0	P70279;A2ALA0	Surfeit locus protein 6	2
Anxa2	#VALUE!	0	11551100	NaN	P07356;B0V2N7;B0V2N8;B0V2N5	P07356;B0V2N7;B0V2N8;B0V2N5	Annexin A2;Annexin	4
Ddx10	#VALUE!	0	11705000	NaN	Q80Y44	Q80Y44	Probable ATP-dependent RNA helicase DDX10	1
Dkc1	#VALUE!	0	11761000	NaN	Q9ESX5;B7ZCL7;F6YUI5;A2AN81;F6S1S5	Q9ESX5;B7ZCL7;F6YUI5;A2AN81	H/ACA ribonucleoprotein complex subunit 4	5
Nop16	#VALUE!	0	11830850	NaN	D3Z7M5;Q9CPT5	D3Z7M5;Q9CPT5	Nucleolar protein 16	2
Apobec1	#VALUE!	0	11834470	NaN	P51908;D3Z675	P51908	C->U-editing enzyme APOBEC-1	2
Mrpl22	#VALUE!	0	11916500	NaN	Q8BU88	Q8BU88	39S ribosomal protein L22, mitochondrial	1
Myh9	#VALUE!	0	12133000	NaN	Q8VDD5;Q3UH59;Q5SV64;Q61879	Q8VDD5	Myosin-9	4
Nop14	#VALUE!	0	12158960	NaN	Q8R3N1	Q8R3N1	Nucleolar protein 14	1
Ythdf1	#VALUE!	0	12266550	NaN	A2AWN8;P59326	A2AWN8;P59326	YTH domain family protein 1	2
Sec63	#VALUE!	0	12360660	NaN	Q8VHE0	Q8VHE0	Translocation protein SEC63 homolog	1
Rbm4;Rbm14/Rbm4 fusion;Rbm4b	#VALUE!	0	12376010	NaN	F7BGR7;Q8C7Q4;J3QPA9;B0LM42;F6TBN8;Q8C7Q4-2;Q5CZX8	F7BGR7;Q8C7Q4;J3QPA9;B0LM42;F6TBN8	RNA-binding protein 4	7
Urb1	#VALUE!	0	12532940	NaN	E9PU96;Q571H0	E9PU96;Q571H0	Nucleolar pre-ribosomal-associated protein 1	2
Cpeb4	#VALUE!	0	12846530	NaN	Q7TN98;Q7TN98-2;Q5SU48;Q7TN98-3;Q7TN98-5;Q7TN98-4;Q5SU47	Q7TN98;Q7TN98-2;Q5SU48;Q7TN98-3;Q7TN98-5;Q7TN98-4;Q5SU47	Cytoplasmic polyadenylation element-binding protein 4	7
Ssr1	#VALUE!	0	13131400	NaN	Q9CY50	Q9CY50	Translocon-associated protein subunit alpha	1
Hmgb2	#VALUE!	0	13251990	NaN	P30681	P30681	High mobility group protein B2	1
Ddx39b	#VALUE!	0	13575000	NaN	Q9Z1N5;G3UXI6	Q9Z1N5;G3UXI6	Spliceosome RNA helicase Ddx39b	2
Rbm39	#VALUE!	0	13597400	NaN	Q8VH51;Q8VH51-2;E9Q8F0;Q8VH51-3;F7AA45;B7ZD61;B7ZD63;D6RJ85;E9Q999;D6RCZ8;E9PZF9;B7ZD64	Q8VH51;Q8VH51-2;E9Q8F0;Q8VH51-3;F7AA45	RNA-binding protein 39	12
Wdr43	#VALUE!	0	13781000	NaN	Q6ZQL4	Q6ZQL4	WD repeat-containing protein 43	1
Akap8	#VALUE!	0	13954300	NaN	Q9DBR0	Q9DBR0	A-kinase anchor protein 8	1
Trmt1l	#VALUE!	0	13962000	NaN	A2RSY6;A2RSY6-2;A2RSY6-3	A2RSY6;A2RSY6-2;A2RSY6-3	TRMT1-like protein	3
Isg20l2	#VALUE!	0	14045150	NaN	Q3U1G5	Q3U1G5	Interferon-stimulated 20 kDa exonuclease-like 2	1
Mrp63	#VALUE!	0	14104990	NaN	Q9CQF8	Q9CQF8	Ribosomal protein 63, mitochondrial	1
Mrpl13	#VALUE!	0	14185330	NaN	Q9D1P0;F7CXG9;G5E909	Q9D1P0;F7CXG9	39S ribosomal protein L13, mitochondrial	3
Ddx31	#VALUE!	0	14296000	NaN	Q6NZQ2	Q6NZQ2		1
Trim56	#VALUE!	0	14344900	NaN	Q80VI1	Q80VI1	E3 ubiquitin-protein ligase TRIM56	1
Rrs1	#VALUE!	0	14365000	NaN	Q9CYH6	Q9CYH6	Ribosome biogenesis regulatory protein homolog	1
Kif13b	#VALUE!	0	14484000	NaN	E9Q4K7	E9Q4K7		1
Gigyf2	#VALUE!	0	14598760	NaN	Q6Y7W8;G3UYG6;G3UWR2;G3UYR9;E9Q2M5;G3UZX7;G3UZW5;Q6Y7W8-2;G3UYH4;G3UZS9;G3UWT6	Q6Y7W8;G3UYG6;G3UWR2;G3UYR9;E9Q2M5;G3UZX7	PERQ amino acid-rich with GYF domain-containing protein 2	11
Pcbp4	#VALUE!	0	14650000	NaN	P57724	P57724	Poly(rC)-binding protein 4	1
Dcaf13	#VALUE!	0	14853770	NaN	Q6PAC3	Q6PAC3	DDB1- and CUL4-associated factor 13	1
Larp4b	#VALUE!	0	15083330	NaN	Q6A0A2;Q6A0A2-3;Q6A0A2-2	Q6A0A2;Q6A0A2-3;Q6A0A2-2	La-related protein 4B	3
Rpl36-ps3;Rpl36;Gm5745	#VALUE!	0	15090000	NaN	D3YW41;Q6ZWZ4;D3Z3R1;P47964;D3YX71	D3YW41;Q6ZWZ4;D3Z3R1;P47964	60S ribosomal protein L36	5
Taf15	#VALUE!	0	15220000	NaN	Q8BQ46;F6QCI0	Q8BQ46;F6QCI0		2
Rrp36	#VALUE!	0	15374000	NaN	Q3UFY0	Q3UFY0	Ribosomal RNA processing protein 36 homolog	1
Zfr	#VALUE!	0	15384900	NaN	O88532;F6QJP7;F6V459;D3Z5G4	O88532	Zinc finger RNA-binding protein	4
Cnot1	#VALUE!	0	15514670	NaN	Q6ZQ08-4;Q6ZQ08;Q6ZQ08-2;B7ZWL1;Q6ZQ08-3	Q6ZQ08-4;Q6ZQ08;Q6ZQ08-2;B7ZWL1	CCR4-NOT transcription complex subunit 1	5
Brix1	#VALUE!	0	15531000	NaN	Q9DCA5;F6WEP7;E9Q2V8	Q9DCA5;F6WEP7	Ribosome biogenesis protein BRX1 homolog	3
Snrpe	#VALUE!	0	15606000	NaN	P62305;E9Q4F4;E9Q0W8	P62305;E9Q4F4;E9Q0W8	Small nuclear ribonucleoprotein E	3
Rbms3	1.62838	0	15827000	48931680	Q8BWL5-5;Q8BWL5;Q8BWL5-2;Q8BWL5-3;Q8BWL5-6;Q8BWL5-4;G3UZJ9;G3UYP9;G3UY10	Q8BWL5-5;Q8BWL5;Q8BWL5-2;Q8BWL5-3;Q8BWL5-6;Q8BWL5-4;G3UZJ9	RNA-binding motif, single-stranded-interacting protein 3	9
Poldip3	#VALUE!	0	15844600	NaN	Q8BG81;Q3UDD3;F6VR84	Q8BG81;Q3UDD3;F6VR84	Polymerase delta-interacting protein 3	3
Rc3h1	#VALUE!	0	15915100	NaN	Q4VGL6;H7BX02;P0C090;A2AVP4	Q4VGL6;H7BX02	Roquin	4
Fn1	#VALUE!	0	16129660	NaN	P11276	P11276	Fibronectin;Anastellin	1
Gm10020;Rpl15;Gm8420	#VALUE!	0	16159010	NaN	E9QAZ2;Q9CZM2;E9Q1X1;B8JKK2	E9QAZ2;Q9CZM2;E9Q1X1;B8JKK2	Ribosomal protein L15;60S ribosomal protein L15	4
Znf326;Zfp326	#VALUE!	0	16301000	NaN	O88291;D3YXQ7;O88291-3;D6RG92	O88291;D3YXQ7	DBIRD complex subunit ZNF326	4
Ppan	#VALUE!	0	16452000	NaN	Q91YU8	Q91YU8	Suppressor of SWI4 1 homolog	1
Ythdf2	#VALUE!	0	17040330	NaN	Q91YT7;E9PW90;F6Y6H7	Q91YT7		3
H3f3c;Hist1h3a;Hist1h3b;H3f3a	#VALUE!	0	17087500	NaN	P02301;P68433;P84228;P84244;F8WI35;E0CZ27;E0CYR7;E0CYN1	P02301;P68433;P84228;P84244;F8WI35;E0CZ27;E0CYR7;E0CYN1	Histone H3.3C;Histone H3.1;Histone H3.2;Histone H3.3;Histone H3	8
Tnpo1	-0.746349	0	17329000	10330000	Q8BFY9;Q8BFY9-2;Q3TKD0;Q99LG2;E9PV58;J3QMX2	Q8BFY9;Q8BFY9-2;Q3TKD0	Transportin-1	6
Noc3l	#VALUE!	0	17459240	NaN	Q8VI84	Q8VI84	Nucleolar complex protein 3 homolog	1
Snrnp70	#VALUE!	0	17598200	NaN	Q62376;Q62376-2	Q62376;Q62376-2	U1 small nuclear ribonucleoprotein 70 kDa	2
Rrp8	#VALUE!	0	17747250	NaN	E9PVA2;Q9DB85	E9PVA2;Q9DB85	Ribosomal RNA-processing protein 8	2
Eif4g3	#VALUE!	0	17871500	NaN	Q80XI3-3;A2AMI2;Q80XI3;Q80XI3-4;Q80XI3-2;A2AMI7	Q80XI3-3;A2AMI2;Q80XI3;Q80XI3-4;Q80XI3-2;A2AMI7	Eukaryotic translation initiation factor 4 gamma 3	6
Utp18	#VALUE!	0	17928190	NaN	Q5SSI6	Q5SSI6	U3 small nucleolar RNA-associated protein 18 homolog	1
Kif1c	#VALUE!	0	18025010	NaN	E9Q9B0;O35071;Q3V3Y9;Q80TF6;F8VQ75;Q9EQW7;B1AVY7;A2AKI2	E9Q9B0;O35071;Q3V3Y9	Kinesin-like protein KIF1C	8
Zcchc6	#VALUE!	0	18122990	NaN	Q5BLK4;E9PUA2	Q5BLK4;E9PUA2	Terminal uridylyltransferase 7	2
Rps25	-1.59982	0	18383630	6065103	P62852	P62852	40S ribosomal protein S25	1
Xrn2	0.211144	0	18850970	21822000	Q9DBR1;Q9DBR1-2	Q9DBR1;Q9DBR1-2	5-3 exoribonuclease 2	2
0	-1.59964	0	19149060	6318398	Q8BMC4	Q8BMC4	Pumilio domain-containing protein C14orf21 homolog	1
Mrpl41;Gm6434	#VALUE!	0	19333500	NaN	Q9CQN7;F7CXS7	Q9CQN7;F7CXS7	39S ribosomal protein L41, mitochondrial	2
Nolc1	#VALUE!	0	19477010	NaN	E9Q5C9	E9Q5C9		1
Xrn1	#VALUE!	0	19768330	NaN	F8VQ87;P97789;P97789-2;P97789-3	F8VQ87;P97789;P97789-2;P97789-3	5-3 exoribonuclease 1	4
Syncrip	#VALUE!	0	19820000	NaN	Q7TMK9;G3V018;G3UWM1;G3XA76;G3UXU5	Q7TMK9;G3V018	Heterogeneous nuclear ribonucleoprotein Q	5
Nsun5	#VALUE!	0	19889140	NaN	Q8K4F6;E9QAY1	Q8K4F6	Putative methyltransferase NSUN5	2
Ubap2	#VALUE!	0	20000200	NaN	Q91VX2;A2AMY5;F6PYV5;A2AMY7	Q91VX2;A2AMY5;F6PYV5	Ubiquitin-associated protein 2	4
Ddx6	#VALUE!	0	20636330	NaN	P54823	P54823	Probable ATP-dependent RNA helicase DDX6	1
Pum1	#VALUE!	0	21410010	NaN	Q80U78-2;E9Q6M7	Q80U78-2;E9Q6M7		2
Otud4	#VALUE!	0	21727670	NaN	B2RRE7;G3UXQ0;G3UXM1	B2RRE7	OTU domain-containing protein 4	3
Samd4a	#VALUE!	0	21816010	NaN	Q8CBY1;Q8CBY1-3;Q8CBY1-2;Q8CBY1-4	Q8CBY1;Q8CBY1-3;Q8CBY1-2	Protein Smaug homolog 1	4
Aqr	#VALUE!	0	22547660	NaN	Q8CFQ3;A2AQA7;REV__Q9Z0R6;REV__E9QNG1;REV__Q9Z0R6-2	Q8CFQ3;A2AQA7	Intron-binding protein aquarius	5
Snrpf	#VALUE!	0	22602490	NaN	P62307	P62307	Small nuclear ribonucleoprotein F	1
Utp14a	#VALUE!	0	22770490	NaN	Q640M1;Q640M1-2;Q6EJB6	Q640M1	U3 small nucleolar RNA-associated protein 14 homolog A	3
Serbp1	#VALUE!	0	23129000	NaN	Q9CY58	Q9CY58	Plasminogen activator inhibitor 1 RNA-binding protein	1
Fyttd1	#VALUE!	0	23805500	NaN	Q91Z49;Q91Z49-2;Q91Z49-3;D3Z591	Q91Z49;Q91Z49-2;Q91Z49-3;D3Z591	UAP56-interacting factor	4
Rbfox2;Rbfox1	0.187337	0	24010670	27340000	Q8BP71;Q8BP71-5;Q8BP71-2;Q9JJ43-3;Q9JJ43;Q9JJ43-6;Q8BP71-3;Q8BP71-8;Q9JJ43-4;Q8BP71-7;Q9JJ43-2;Q9JJ43-5;Q8BP71-6;Q8BIF2;Q9JJ43-7;Q8BIF2-2;Q8BP71-4;Q8BIF2-3;Q8BIF2-5;Q8BIF2-4;A2A4W9;B7ZC11	Q8BP71;Q8BP71-5;Q8BP71-2;Q9JJ43-3;Q9JJ43;Q9JJ43-6;Q8BP71-3;Q8BP71-8;Q9JJ43-4;Q8BP71-7;Q9JJ43-2;Q9JJ43-5;Q8BP71-6	RNA binding protein fox-1 homolog 2;RNA binding protein fox-1 homolog 1	22
Rps23	#VALUE!	0	24274340	NaN	P62267	P62267	40S ribosomal protein S23	1
Rbm34	#VALUE!	0	24493500	NaN	B2RUP0;Q8C5L7	B2RUP0;Q8C5L7	RNA-binding protein 34	2
Map4;Mtap4	#VALUE!	0	24842000	NaN	P27546;P27546-2;P27546-3;E9QPW8;E9PZ43;E9PWC0;P27546-4;Q78TF3;F6V4Z1;F6XPV7	P27546;P27546-2;P27546-3;E9QPW8	Microtubule-associated protein 4;Microtubule-associated protein	10
Rbm10	#VALUE!	0	25041660	NaN	Q99KG3-2;Q99KG3;Q99KG3-3	Q99KG3-2;Q99KG3;Q99KG3-3	RNA-binding protein 10	3
Utp15	#VALUE!	0	25945000	NaN	Q8C7V3	Q8C7V3	U3 small nucleolar RNA-associated protein 15 homolog	1
Rpl10a	#VALUE!	0	25952340	NaN	Q5XJF6;P53026;D3YXT2;D6RE43	Q5XJF6;P53026	Ribosomal protein;60S ribosomal protein L10a	4
Rpl30	-0.102317	0	27337670	25466010	P62889	P62889	60S ribosomal protein L30	1
Rpl24	#VALUE!	0	27877840	NaN	Q8BP67;E9Q132	Q8BP67;E9Q132	60S ribosomal protein L24	2
Hist1h1e	#VALUE!	0	27878500	NaN	P43274	P43274	Histone H1.4	1
Rpl35	#VALUE!	0	28185010	NaN	Q6ZWV7	Q6ZWV7	60S ribosomal protein L35	1
Zc3h11a	#VALUE!	0	29404510	NaN	Q6NZF1	Q6NZF1	Zinc finger CCCH domain-containing protein 11A	1
Cirbp	0.185133	0	29513010	33553990	P60824;K4DI65;D3YU80	P60824;K4DI65;D3YU80	Cold-inducible RNA-binding protein	3
Rrp1b	#VALUE!	0	29703020	NaN	Q91YK2;D6RDD0;F7AGW8	Q91YK2	Ribosomal RNA processing protein 1 homolog B	3
Ddx56	#VALUE!	0	29913330	NaN	Q9D0R4;Q5SVX2	Q9D0R4;Q5SVX2	Probable ATP-dependent RNA helicase DDX56	2
Hspa9	#VALUE!	0	29937990	NaN	P38647	P38647	Stress-70 protein, mitochondrial	1
Gm13646;Hist1h2bf;Hist1h2bm;Hist1h2bb;Hist1h2bh;Hist2h2bb;Hist1h2bc;Hist1h2bk;Hist1h2bp;Hist1h2ba;Hist2h2be;Hist3h2bb;Hist3h2ba	#VALUE!	0	30122490	NaN	Q8CGP2-2;Q8CBB6;P10853;P10854;Q64475;Q64478;Q64525;Q6ZWY9;Q8CGP1;Q8CGP2;P70696;Q64524;Q8CGP0;Q9D2U9;G3X9D5	Q8CGP2-2;Q8CBB6;P10853;P10854;Q64475;Q64478;Q64525;Q6ZWY9;Q8CGP1;Q8CGP2;P70696;Q64524;Q8CGP0;Q9D2U9;G3X9D5	Histone H2B;Histone H2B type 1-F/J/L;Histone H2B type 1-M;Histone H2B type 1-B;Histone H2B type 1-H;Histone H2B type 2-B;Histone H2B type 1-C/E/G;Histone H2B type 1-K;Histone H2B type 1-P;Histone H2B type 1-A;Histone H2B type 2-E;Histone H2B type 3-B;Histone H2B type 3-A	15
Rpl13;Rpl13-ps3	#VALUE!	0	30697670	NaN	P47963;D3YX54	P47963;D3YX54	60S ribosomal protein L13	2
Try5;Try4	#VALUE!	0	31082990	NaN	Q9QUK9;Q9R0T7	Q9QUK9;Q9R0T7		2
Sf3b1	-0.937814	0	31822320	16611990	G5E866;Q99NB9	G5E866;Q99NB9	Splicing factor 3B subunit 1	2
Thrap3	#VALUE!	0	32079000	NaN	Q569Z6;Q8BZN7;F6YSQ2	Q569Z6;Q8BZN7	Thyroid hormone receptor-associated protein 3	3
Pum2	#VALUE!	0	32194980	NaN	Q3UR91;Q80U58-2;Q3TQ29;Q80U58-3;E9PW51;E9Q4Q6;E9Q765;F6YD01;F7A034	Q3UR91;Q80U58-2;Q3TQ29;Q80U58-3		9
Heatr1	#VALUE!	0	33837320	NaN	G3X9B1	G3X9B1		1
Zc3h7a	-1.71853	0	34081680	10355990	E9PWW6;E9Q8M5;E9Q0D3;D6RI42;D3YZY2;D3Z5I3;D3YVH9	E9PWW6;E9Q8M5;E9Q0D3		7
Myef2	#VALUE!	0	34553660	NaN	Q8C854;Q8C854-3;A2ATP6;A2ATP5;G8JL68;Q8C854-1	Q8C854;Q8C854-3;A2ATP6;A2ATP5;G8JL68;Q8C854-1	Myelin expression factor 2	6
Rrp12	#VALUE!	0	35123990	NaN	Q6P5B0	Q6P5B0	RRP12-like protein	1
Tdrd3	#VALUE!	0	35206660	NaN	Q91W18;Q91W18-3;Q91W18-2;F6ZI20;E9Q6T6	Q91W18;Q91W18-3;Q91W18-2	Tudor domain-containing protein 3	5
Rbm22	0.108221	0	35765000	38551020	Q8BHS3	Q8BHS3	Pre-mRNA-splicing factor RBM22	1
Ddx18	#VALUE!	0	35834500	NaN	Q8K363;F6ZX28	Q8K363	ATP-dependent RNA helicase DDX18	2
Rps16	#VALUE!	0	36095680	NaN	P14131	P14131	40S ribosomal protein S16	1
Mbnl1	-1.4587	0	36855980	13409000	G3X9Q0;Q9JKP5;Q8R003	G3X9Q0;Q9JKP5	Muscleblind-like protein 1	3
Rpl31	#VALUE!	0	37114100	NaN	P62900	P62900	60S ribosomal protein L31	1
Wdr36	#VALUE!	0	38245680	NaN	Q3TAQ9;Q3TA68	Q3TAQ9;Q3TA68		2
Utp20	#VALUE!	0	38481010	NaN	E9QK83;Q5XG71	E9QK83;Q5XG71	Small subunit processome component 20 homolog	2
Wdr46	#VALUE!	0	38651680	NaN	Q9Z0H1	Q9Z0H1	WD repeat-containing protein 46	1
Ebna1bp2	#VALUE!	0	39281380	NaN	Q9D903;A2ACZ1	Q9D903;A2ACZ1	Probable rRNA-processing protein EBP2	2
Dhx36	-2.61338	0	40460660	6611900	Q8VHK9	Q8VHK9	Probable ATP-dependent RNA helicase DHX36	1
Ftsj3	-1.81963	0	40791660	11556000	Q9DBE9	Q9DBE9	Putative rRNA methyltransferase 3	1
Rpl27a	#VALUE!	0	40934310	NaN	P14115	P14115	60S ribosomal protein L27a	1
Trim25	-2.02539	0	41133680	10104000	Q61510;Q5SU71;Q5SU72	Q61510;Q5SU71;Q5SU72	E3 ubiquitin/ISG15 ligase TRIM25	3
Dhx15	#VALUE!	0	42411330	NaN	O35286;G3X8X0;Q05BH3	O35286	Putative pre-mRNA-splicing factor ATP-dependent RNA helicase DHX15	3
Ddx27	#VALUE!	0	42430340	NaN	Q921N6;H3BLJ6;Q921N6-2	Q921N6	Probable ATP-dependent RNA helicase DDX27	3
Smc1b	#VALUE!	0	43068000	NaN	Q920F6	Q920F6	Structural maintenance of chromosomes protein 1B	1
Rpl29;Gm17669;Gm10709	#VALUE!	0	43461960	NaN	P47915;F6QL70;D3Z1N9;F6YH22;F6VZG1	P47915;F6QL70;D3Z1N9	60S ribosomal protein L29	5
Zc3hav1	-1.51384	0	43643660	15283010	D3Z5I1;Q3UPF5;Q3UPF5-2;G3X9X5	D3Z5I1;Q3UPF5;Q3UPF5-2;G3X9X5	Zinc finger CCCH-type antiviral protein 1	4
Rpl32;Gm4987	#VALUE!	0	43786520	NaN	P62911;A2AD25	P62911;A2AD25	60S ribosomal protein L32	2
Mtdh	-0.675696	0	44541000	27884010	Q80WJ7;E9PUX0;F6QHD1;F6ZSG0;F6ZQL0;F6QFT1	Q80WJ7;E9PUX0	Protein LYRIC	6
Rpl23a-ps3;Rpl23a;Gm10335;Gm3940;Rpl23a-ps1;Gm10923;Gm6096	#VALUE!	0	45898670	NaN	D3YWP3;P62751;D3Z1D6;D3YU45;D3YW68;D3YU46;D3YTY6	D3YWP3;P62751;D3Z1D6;D3YU45;D3YW68;D3YU46;D3YTY6	60S ribosomal protein L23a	7
Rpl19	#VALUE!	0	46872320	NaN	P84099;A2A547	P84099;A2A547	60S ribosomal protein L19;Ribosomal protein L19	2
Gar1	-2.37966	0	46957520	9023103	Q9CY66;Q9CY66-2;Q9CY66-3;D3YZ09;F6SL78	Q9CY66;Q9CY66-2;Q9CY66-3;D3YZ09;F6SL78	H/ACA ribonucleoprotein complex subunit 1	5
Srrm2	0.959732	0	47808480	92985030	Q8BTI8;Q8BTI8-3;Q8BTI8-2;D3Z667;P0C6F1	Q8BTI8;Q8BTI8-3;Q8BTI8-2	Serine/arginine repetitive matrix protein 2	5
Fam120c	#VALUE!	0	48912340	NaN	Q8C3F2;Q8C3F2-3;Q8C3F2-2	Q8C3F2;Q8C3F2-3	Constitutive coactivator of PPAR-gamma-like protein 2	3
Fxr2	-1.05023	0	48949020	23636990	Q6P5B5;Q9WVR4	Q6P5B5;Q9WVR4	Fragile X mental retardation syndrome-related protein 2	2
Gnl3	#VALUE!	0	48963660	NaN	Q8CI11;Q8CI11-2	Q8CI11;Q8CI11-2	Guanine nucleotide-binding protein-like 3	2
Snrpd1	#VALUE!	0	49269500	NaN	P62315	P62315	Small nuclear ribonucleoprotein Sm D1	1
Nufip2	#VALUE!	0	49940650	NaN	Q5F2E7;Q5F2E7-2	Q5F2E7;Q5F2E7-2	Nuclear fragile X mental retardation-interacting protein 2	2
Rpl7a-ps3;Rpl7a-ps5;Rpl7a-ps10;Gm5619;Rpl7a;Gm5459;Rpl7a-ps8;Gm17415	#VALUE!	0	50887350	NaN	D3YU93;F6U2H0;D3YVE6;D3YXT4;L7N202;P12970;F6ZVW4;F6TIC7;F6YI27;F6VBB8;F6SSI5	D3YU93;F6U2H0;D3YVE6;D3YXT4;L7N202;P12970;F6ZVW4;F6TIC7;F6YI27	60S ribosomal protein L7a	11
Gm10320;Sec61b	#VALUE!	0	51738980	NaN	E9PW43;Q9CQS8	E9PW43;Q9CQS8	Protein transport protein Sec61 subunit beta	2
Pum1	#VALUE!	0	52551970	NaN	Q80U78;Q80U78-3;Q3TTW5;Q80U78-4;A8WHM8	Q80U78;Q80U78-3;Q3TTW5	Pumilio homolog 1	5
Spats2l	#VALUE!	0	53366320	NaN	E9PVQ3;Q91WJ7;Q91WJ7-2;E9Q7S4;E9PZE9;E9Q5S6;E9Q106	E9PVQ3;Q91WJ7;Q91WJ7-2;E9Q7S4;E9PZE9	SPATS2-like protein	7
Rpl34;Gm2178	#VALUE!	0	54005500	NaN	Q9D1R9;D3YWC0	Q9D1R9;D3YWC0	60S ribosomal protein L34	2
Rpl10;Rpl10l	-1.0982	0	55585680	25963990	Q6ZWV3;I7HLV2;P86048;B7FAU6	Q6ZWV3;I7HLV2;P86048	60S ribosomal protein L10;60S ribosomal protein L10-like	4
H2afx;Hist1h2ab;Hist2h2aa1;Hist3h2a;Hist1h2af;Hist1h2ak;Hist2h2ac;Hist1h2aa;H2afj;Hist1h2ah;Hist1h2al;Hist2h2ab;H2afz;H2afv	-1.54838	0	55625390	19018000	P27661;P22752;Q6GSS7;Q8BFU2;Q8CGP5;Q8CGP7;Q64523;Q8CGP4;Q8R1M2;Q8CGP6;F8WIX8;Q64522;P0C0S6;Q3THW5;Q3UA95;Q8R029;G3UWL7	P27661;P22752;Q6GSS7;Q8BFU2;Q8CGP5;Q8CGP7;Q64523;Q8CGP4;Q8R1M2;Q8CGP6;F8WIX8;Q64522;P0C0S6;Q3THW5	Histone H2A.x;Histone H2A type 1;Histone H2A type 2-A;Histone H2A type 3;Histone H2A type 1-F;Histone H2A type 1-K;Histone H2A type 2-C;Histone H2A;Histone H2A.J;Histone H2A type 1-H;Histone H2A type 2-B;Histone H2A.Z;Histone H2A.V	17
Rbm15	#VALUE!	0	56574000	NaN	Q0VBL3;REV__A2AX52;Q9D952;Q8BKT2	Q0VBL3		4
Snrpd2;Gm5449	#VALUE!	0	57903340	NaN	P62317;D3Z5N9	P62317;D3Z5N9	Small nuclear ribonucleoprotein Sm D2	2
Rps8	#VALUE!	0	59456670	NaN	P62242	P62242	40S ribosomal protein S8	1
Gtpbp4	#VALUE!	0	59962000	NaN	Q99ME9	Q99ME9	Nucleolar GTP-binding protein 1	1
Snrpd3	-2.10218	0	61999330	14440000	P62320	P62320	Small nuclear ribonucleoprotein Sm D3	1
Nop2	#VALUE!	0	62812670	NaN	E9QN31;Q922K7	E9QN31;Q922K7	Putative ribosomal RNA methyltransferase NOP2	2
Rpl3	#VALUE!	0	63959020	NaN	P27659;E9PWZ3;Q9CQ09	P27659	60S ribosomal protein L3	3
Rpl26	-2.50327	0	64209330	11325000	K4DI68;P61255;B1ARA5;B1ARA3	K4DI68;P61255;B1ARA5;B1ARA3	60S ribosomal protein L26	4
Zc3h7b	-1.98879	0	66378310	16724000	F8VPP8	F8VPP8		1
Kiaa0020	-4.18601	0	69525330	3819701	Q8BKS9	Q8BKS9	Pumilio domain-containing protein KIAA0020	1
Jup	#VALUE!	0	81226000	NaN	Q02257;Q02248;E9Q6A9;F7CRC6;F7BAC9	Q02257	Junction plakoglobin	5
Rbm15b	#VALUE!	0	84173480	NaN	Q6PHZ5	Q6PHZ5	Putative RNA-binding protein 15B	1
Eif2c2	#VALUE!	0	85604640	NaN	Q8CJG0	Q8CJG0	Protein argonaute-2	1
Znfx1	-1.66093	0	85613660	27074000	Q8R151;A2A5R5;A2A5R4;A2A5R6	Q8R151;A2A5R5;A2A5R4	NFX1-type zinc finger-containing protein 1	4
Top3b	-2.38262	0	87562330	16791000	Q9Z321;F6SDD7;D3YWY3;D3Z084;D3YY65;D3YW63;D3Z2F4;F7A473;D3Z758	Q9Z321;F6SDD7	DNA topoisomerase 3-beta-1;DNA topoisomerase	9
Prrc2a	-2.57231	0	93645340	15745000	Q7TSC1;G3UX48	Q7TSC1;G3UX48	Protein PRRC2A	2
Rbm28	#VALUE!	0	102125300	NaN	Q8CGC6;F6SB18;REV__K3W4R8;REV__Q3UGM2;REV__J3QQ43	Q8CGC6	RNA-binding protein 28	5
0	#VALUE!	0	109560000	NaN	Q9CY58-2;Q9CY58-3;Q9CY58-4	Q9CY58-2;Q9CY58-3;Q9CY58-4		3
Rpl18a	#VALUE!	0	133669700	NaN	P62717;F6YJW4	P62717	60S ribosomal protein L18a	2
Rpl14	#VALUE!	0	150275000	NaN	Q9CR57	Q9CR57	60S ribosomal protein L14	1
Rpl5	#VALUE!	0	151519700	NaN	P47962;D3YYV8	P47962;D3YYV8	60S ribosomal protein L5	2
Rsl1d1	#VALUE!	0	170283300	NaN	Q8BVY0	Q8BVY0		1
Ate1	#VALUE!	0	176069900	NaN	Q9Z2A5;Q9Z2A5-2;J3QNU1;Q4FCQ7	Q9Z2A5;Q9Z2A5-2;J3QNU1;Q4FCQ7	Arginyl-tRNA--protein transferase 1	4
Mki67ip	#VALUE!	0	181605400	NaN	Q91VE6;Q91VE6-2;E0CXU3	Q91VE6;Q91VE6-2	MKI67 FHA domain-interacting nucleolar phosphoprotein	3
Rps6	-3.22405	0	182593000	19541000	P62754	P62754	40S ribosomal protein S6	1
Gm10119;Rps3a;Gm9000	-3.52442	0	182843600	15890000	D3Z6C3;P97351;D3Z7W7	D3Z6C3;P97351;D3Z7W7	40S ribosomal protein S3a	3
Rps24	#VALUE!	0	194492700	NaN	P62849;P62849-3;P62849-2	P62849;P62849-3;P62849-2	40S ribosomal protein S24	3
Nek9	#VALUE!	0	316110000	NaN	Q8K1R7	Q8K1R7	Serine/threonine-protein kinase Nek9	1
Mocs3	#VALUE!	0	458149800	NaN	A2BDX3	A2BDX3	Adenylyltransferase and sulfurtransferase MOCS3;Molybdopterin-synthase adenylyltransferase;Molybdopterin-synthase sulfurtransferase	1
Rpl8	#VALUE!	0	572651800	NaN	P62918	P62918	60S ribosomal protein L8	1
Ddx54	#VALUE!	0	3305166000	NaN	Q8K4L0	Q8K4L0	ATP-dependent RNA helicase DDX54	1
Anxa1	#VALUE!	0	NaN	421970	P10107	P10107	Annexin A1	1
Ktn1	#VALUE!	0	NaN	504650	F8VQC7;Q61595;Q61595-11;Q61595-7;Q61595-10;Q61595-15;Q61595-5;Q61595-13;Q61595-8;Q61595-9;Q61595-4;Q61595-6;Q61595-14;Q61595-3;Q61595-16;Q61595-12;Q61595-2	F8VQC7;Q61595;Q61595-11;Q61595-7;Q61595-10;Q61595-15;Q61595-5;Q61595-13;Q61595-8;Q61595-9;Q61595-4;Q61595-6;Q61595-14;Q61595-3;Q61595-16;Q61595-12;Q61595-2	Kinectin	17
Ngdn	#VALUE!	0	NaN	643220	Q9DB96	Q9DB96	Neuroguidin	1
Fabp5	#VALUE!	0	NaN	2315599	Q05816	Q05816	Fatty acid-binding protein, epidermal	1
Gspt1;Gspt2	#VALUE!	0	NaN	2620899	Q8R050;Q8R050-2;Q149F3;F7CE88	Q8R050;Q8R050-2;Q149F3;F7CE88	Eukaryotic peptide chain release factor GTP-binding subunit ERF3A;Eukaryotic peptide chain release factor GTP-binding subunit ERF3B	4
Eif4g2	#VALUE!	0	NaN	2834899	Q62448;Q62448-2;F6TW20	Q62448;Q62448-2	Eukaryotic translation initiation factor 4 gamma 2	3
0	#VALUE!	0	NaN	2960599	Q8BZR9	Q8BZR9	Uncharacterized protein C17orf85 homolog	1
Mrps27	#VALUE!	0	NaN	3345999	Q8BK72	Q8BK72	28S ribosomal protein S27, mitochondrial	1
Eif4g2	#VALUE!	0	NaN	4655501	G3XA17;F7CBP1	G3XA17;F7CBP1		2
Rbmxl1	#VALUE!	0	NaN	5206402	Q91VM5;Q9DAE2	Q91VM5	RNA binding motif protein, X-linked-like-1;RNA binding motif protein, X-linked-like-1, N-terminally processed	2
Txn	#VALUE!	0	NaN	5352098	P10639	P10639	Thioredoxin	1
Sbds	#VALUE!	0	NaN	6262297	P70122;F6TN03	P70122;F6TN03	Ribosome maturation protein SBDS	2
Chordc1	#VALUE!	0	NaN	7962002	Q9D1P4	Q9D1P4	Cysteine and histidine-rich domain-containing protein 1	1
Qki	#VALUE!	0	NaN	8613704	Q9QYS9-7;Q9QYS9;Q9QYS9-2;Q9QYS9-6;Q9QYS9-3;Q9QYS9-4;Q9QYS9-8;Q9QYS9-5	Q9QYS9-7;Q9QYS9;Q9QYS9-2;Q9QYS9-6;Q9QYS9-3;Q9QYS9-4;Q9QYS9-8;Q9QYS9-5	Protein quaking	8
Dnajc2	#VALUE!	0	NaN	8759702	P54103;E9Q9H3;E9Q9H2	P54103;E9Q9H3;E9Q9H2	DnaJ homolog subfamily C member 2	3
Eif3j	#VALUE!	0	NaN	8883595	Q66JS6;Q3UGC7	Q66JS6;Q3UGC7	Eukaryotic translation initiation factor 3 subunit J	2
Cisd1	#VALUE!	0	NaN	9666698	Q91WS0	Q91WS0	CDGSH iron-sulfur domain-containing protein 1	1
Tardbp	#VALUE!	0	NaN	9680997	Q8BLD4	Q8BLD4		1
Lsm4	#VALUE!	0	NaN	10423000	Q9CY46;Q9QXA5;D3YTP8	Q9CY46;Q9QXA5;D3YTP8	U6 snRNA-associated Sm-like protein LSm4	3
Dnajb12	#VALUE!	0	NaN	11652990	Q8C4C9;Q9QYI4	Q8C4C9;Q9QYI4	DnaJ homolog subfamily B member 12	2
Krt76	#VALUE!	0	NaN	12334990	Q3UV17	Q3UV17	Keratin, type II cytoskeletal 2 oral	1
Strbp	#VALUE!	0	NaN	12864990	Q91WM1;Q91WM1-2	Q91WM1;Q91WM1-2	Spermatid perinuclear RNA-binding protein	2
Fbll1	#VALUE!	0	NaN	14191000	Q80WS3	Q80WS3	rRNA/tRNA 2-O-methyltransferase fibrillarin-like protein 1	1
Mrpl19	#VALUE!	0	NaN	14398990	Q9D338	Q9D338	39S ribosomal protein L19, mitochondrial	1
Pde4d	#VALUE!	0	NaN	15177000	F6QFD1	F6QFD1		1
Snrpg	#VALUE!	0	NaN	20928010	P62309	P62309	Small nuclear ribonucleoprotein G	1
Fubp3	#VALUE!	0	NaN	22974000	A2AJ71	A2AJ71		1
Ahnak2	#VALUE!	0	NaN	23107000	E9PYB0;F7DBB3;F7CVJ5	E9PYB0;F7DBB3;F7CVJ5		3
Mbnl2	#VALUE!	0	NaN	23368000	Q8C181-4;Q8C181;Q8C181-2;Q8C181-3	Q8C181-4;Q8C181;Q8C181-2;Q8C181-3	Muscleblind-like protein 2	4
Gpr98	#VALUE!	0	NaN	24105000	B8JJE0;Q8VHN7;D3YYF1;Q8VHN7-4;Q8VHN7-5	B8JJE0;Q8VHN7;D3YYF1;Q8VHN7-4;Q8VHN7-5	G-protein coupled receptor 98	5
A930001N09Rik;Crebrf	#VALUE!	0	NaN	27947010	B8JJI2;Q8CDG5;B8JJI3	B8JJI2;Q8CDG5;B8JJI3	CREB3 regulatory factor	3
Dnaja1	#VALUE!	0	NaN	31309990	P63037;B1AXY1;B1AXY0;B1AXX9	P63037;B1AXY1;B1AXY0;B1AXX9	DnaJ homolog subfamily A member 1	4
N6amt2	#VALUE!	0	NaN	32382980	Q9CY45	Q9CY45	N(6)-adenine-specific DNA methyltransferase 2	1
Ubl4a	#VALUE!	0	NaN	33851990	P21126	P21126	Ubiquitin-like protein 4A	1
Rps12	#VALUE!	0	NaN	34159000	Q6ZWZ6;P63323	Q6ZWZ6;P63323	40S ribosomal protein S12	2
Fau	#VALUE!	0	NaN	37682980	Q642K5;P62862	Q642K5;P62862	40S ribosomal protein S30	2
Pdlim1	#VALUE!	0	NaN	38881990	O70400	O70400	PDZ and LIM domain protein 1	1
Apol8	#VALUE!	0	NaN	39507010	A2VDH7;F6VS49	A2VDH7;F6VS49		2
Cnbp	#VALUE!	0	NaN	40464010	P53996	P53996	Cellular nucleic acid-binding protein	1
Vil1	#VALUE!	0	NaN	41598000	Q62468	Q62468	Villin-1	1
Prss3	#VALUE!	0	NaN	49387020	Q792Z0	Q792Z0		1
0	#VALUE!	0	NaN	57727020	P10711-2	P10711-2		1
Drg2	#VALUE!	0	NaN	140830000	Q9QXB9	Q9QXB9	Developmentally-regulated GTP-binding protein 2	1
Tardbp	#VALUE!	0	NaN	166190000	Q921F2;Q6VYI4;Q6VYI5	Q921F2;Q6VYI4;Q6VYI5	TAR DNA-binding protein 43	3
Cnbp	#VALUE!	0	NaN	169319900	P53996-3;P53996-2;D3YYF6;Q9D548	P53996-3;P53996-2;D3YYF6		4
Syncrip	#VALUE!	0	NaN	300740200	Q7TMK9-2;G3UZI2;G3UZ48;G3UXJ6;G3UYK7;G3UY67	Q7TMK9-2;G3UZI2;G3UZ48;G3UXJ6		6
2210010C04Rik	#VALUE!	0	NaN	2262899000	Q9CPN9	Q9CPN9		1
